# Supplementary material
Source: PubMed Central journal article supplement (PMC9951629)

# **Appendix A.**

**Table A1.** Absolute change of ICRG internal conflict risk score (2020-21) and (log) confirmed COVID-19 death rate per million

|                                  | (1)                                                           | (2)                 | (3)                 | (4)               | (5)                | (6)                  | (7)                  | (8)                |
|----------------------------------|---------------------------------------------------------------|---------------------|---------------------|-------------------|--------------------|----------------------|----------------------|--------------------|
|                                  | Dependent variable: <i>Conflict growth (absolute)</i> (point) |                     |                     |                   |                    |                      |                      |                    |
| <i>COVID_death</i>               | 0.042***<br>(2.63)                                            | 0.044**<br>(2.58)   | 0.056**<br>(2.60)   | 0.059**<br>(2.27) | 0.065**<br>(2.16)  | 0.087***<br>(2.96)   | 0.163***<br>(3.72)   | 0.075***<br>(2.90) |
| <i>Gov_Support</i>               |                                                               | -0.001<br>(-0.37)   | 0.009<br>(0.68)     | 0.009<br>(0.72)   | 0.014<br>(1.25)    | 0.020<br>(1.48)      | 0.037**<br>(2.06)    | 0.016<br>(1.45)    |
| <i>COVID_death × Gov_support</i> |                                                               |                     | -0.001<br>(-0.82)   | -0.002<br>(-0.93) | -0.002<br>(-1.50)  | -0.003<br>(-1.63)    | -0.006**<br>(-2.38)  | -0.002<br>(-1.59)  |
| <i>Inflation</i>                 |                                                               |                     |                     |                   | 0.008***<br>(3.65) | 0.005<br>(0.40)      | -0.004<br>(-0.31)    | 0.008***<br>(4.24) |
| <i>HCI</i>                       |                                                               |                     |                     |                   | -0.146<br>(-0.31)  | -0.066<br>(-0.11)    | 1.289<br>(1.60)      |                    |
| <i>Oil_rent</i>                  |                                                               |                     |                     |                   | 0.001<br>(0.27)    | -0.034***<br>(-3.16) | -0.030***<br>(-2.89) |                    |
| <i>Urbanization</i>              |                                                               |                     |                     |                   | 0.002<br>(0.73)    | 0.004<br>(1.47)      | 0.005*<br>(1.84)     |                    |
| <i>log of GDP per capita</i>     |                                                               |                     |                     |                   | -0.111<br>(-1.40)  | -0.024<br>(-0.25)    | -0.228*<br>(-1.74)   | -0.061<br>(-1.37)  |
| <i>Level of conflict 2020</i>    |                                                               |                     |                     |                   | -0.043<br>(-1.50)  | -0.020<br>(-0.66)    | -0.039<br>(-1.16)    | -0.045<br>(-1.59)  |
| <i>Governance</i>                |                                                               |                     |                     |                   | 0.057<br>(0.69)    | -0.017<br>(-0.18)    | -0.109<br>(-1.08)    |                    |
| <i>Stringency index</i>          |                                                               |                     |                     |                   | 0.004<br>(1.12)    | 0.005<br>(1.45)      | 0.008*<br>(1.98)     |                    |
| <i>Gini index</i>                |                                                               |                     |                     |                   |                    | -0.005<br>(-0.87)    | 0.001<br>(0.14)      |                    |
| <i>Ethnic fractionalization</i>  |                                                               |                     |                     |                   |                    | 0.046<br>(0.27)      | -0.055<br>(-0.32)    |                    |
| <i>Trust in government</i>       |                                                               |                     |                     |                   |                    |                      | 0.004<br>(1.47)      |                    |
| <i>Trust in science</i>          |                                                               |                     |                     |                   |                    |                      | 0.005<br>(0.85)      |                    |
| <i>Africa</i>                    |                                                               |                     |                     | -0.073<br>(-0.35) | -0.128<br>(-0.68)  | -0.035<br>(-0.17)    | 0.258<br>(1.38)      | -0.112<br>(-0.58)  |
| <i>Asia</i>                      |                                                               |                     |                     | -0.173<br>(-0.86) | -0.126<br>(-0.72)  | -0.058<br>(-0.66)    | -0.131<br>(-1.04)    | -0.127<br>(-0.70)  |
| <i>Europe</i>                    |                                                               |                     |                     | -0.079<br>(-0.39) | -0.003<br>(-0.02)  | -0.154<br>(-1.53)    | -0.169<br>(-1.11)    | -0.058<br>(-0.32)  |
| <i>North America</i>             |                                                               |                     |                     | -0.118<br>(-0.56) | -0.144<br>(-0.79)  | -0.319**<br>(-2.64)  | -0.372***<br>(-2.81) | -0.145<br>(-0.76)  |
| <i>South America</i>             |                                                               |                     |                     | -0.097<br>(-0.41) | -0.121<br>(-0.56)  | -0.176<br>(-0.98)    | -0.281<br>(-1.49)    | -0.091<br>(-0.41)  |
| <i>Constant</i>                  | -0.237**<br>(-2.26)                                           | -0.237**<br>(-2.23) | -0.314**<br>(-2.21) | -0.223<br>(-0.80) | 0.693<br>(0.99)    | -0.392<br>(-0.39)    | -0.560<br>(-0.41)    | 0.390<br>(0.75)    |
| Adj. R-squared                   | 0.046                                                         | 0.039               | 0.036               | 0.014             | 0.062              | 0.085                | 0.141                | 0.087              |
| Countries                        | 114                                                           | 114                 | 114                 | 114               | 114                | 85                   | 71                   | 114                |

The method of estimation is ordinary least squares. *t* statistics based on heteroscedasticity-robust standard errors are reported in parentheses. \*\*\*p < 0.01, \*\*p < 0.05, \*p < 0.1.

**Table A2.** Relative change of ICRG internal conflict risk score (2020-21) and (log) confirmed COVID-19 cases per million people

|                                        | (1)                                                      | (2)     | (3)       | (4)     | (5)      | (6)        | (7)        | (8)      |
|----------------------------------------|----------------------------------------------------------|---------|-----------|---------|----------|------------|------------|----------|
|                                        | Dependent variable: <i>Conflict growth (relative, %)</i> |         |           |         |          |            |            |          |
| <i>COVID_case</i>                      | 0.826*                                                   | 0.754   | 1.331**   | 1.212   | 1.566*   | 1.565*     | 5.420***   | 1.916**  |
|                                        | (1.94)                                                   | (1.57)  | (2.18)    | (1.60)  | (1.80)   | (1.71)     | (2.68)     | (2.48)   |
| <i>Gov_Support</i>                     |                                                          | 0.030   | 1.045     | 1.003   | 1.250    | 0.245      | 1.345      | 1.297*   |
|                                        |                                                          | (0.37)  | (1.11)    | (1.22)  | (1.63)   | (0.28)     | (1.13)     | (1.78)   |
| <i>COVID_case</i> × <i>Gov_support</i> |                                                          |         | -0.091    | -0.092  | -0.112   | -0.024     | -0.121     | -0.114*  |
|                                        |                                                          |         | (-1.10)   | (-1.23) | (-1.64)  | (-0.31)    | (-1.15)    | (-1.74)  |
| <i>Inflation</i>                       |                                                          |         |           |         | 0.186*** | -0.039     | -0.307     | 0.183*** |
|                                        |                                                          |         |           |         | (3.88)   | (-0.14)    | (-0.86)    | (4.61)   |
| <i>HCI</i>                             |                                                          |         |           |         | -10.513  | -4.066     | 37.578     |          |
|                                        |                                                          |         |           |         | (-0.76)  | (-0.26)    | (1.47)     |          |
| <i>Oil_rent</i>                        |                                                          |         |           |         | -0.031   | -0.972***  | -0.818**   |          |
|                                        |                                                          |         |           |         | (-0.33)  | (-3.38)    | (-2.51)    |          |
| <i>Urbanization</i>                    |                                                          |         |           |         | 0.014    | 0.068      | 0.087      |          |
|                                        |                                                          |         |           |         | (0.24)   | (0.92)     | (1.03)     |          |
| <i>log of GDP per capita</i>           |                                                          |         |           |         | -1.958   | 0.027      | -7.560*    | -2.210   |
|                                        |                                                          |         |           |         | (-0.94)  | (0.01)     | (-1.83)    | (-1.62)  |
| <i>Level of conflict 2020</i>          |                                                          |         |           |         | -1.636** | -1.197     | -1.242     | -1.570** |
|                                        |                                                          |         |           |         | (-2.00)  | (-1.37)    | (-1.47)    | (-2.11)  |
| <i>Governance</i>                      |                                                          |         |           |         | 0.914    | -1.312     | -4.812     |          |
|                                        |                                                          |         |           |         | (0.48)   | (-0.57)    | (-1.51)    |          |
| <i>Stringency index</i>                |                                                          |         |           |         | 0.089    | 0.109      | 0.103      |          |
|                                        |                                                          |         |           |         | (1.17)   | (1.12)     | (0.92)     |          |
| <i>Gini index</i>                      |                                                          |         |           |         |          | -0.139     | -0.094     |          |
|                                        |                                                          |         |           |         |          | (-0.88)    | (-0.55)    |          |
| <i>Ethnic fractionalization</i>        |                                                          |         |           |         |          | 1.930      | -1.455     |          |
|                                        |                                                          |         |           |         |          | (0.42)     | (-0.33)    |          |
| <i>Trust in government</i>             |                                                          |         |           |         |          |            | 0.110      |          |
|                                        |                                                          |         |           |         |          |            | (1.38)     |          |
| <i>Trust in science</i>                |                                                          |         |           |         |          |            | 0.106      |          |
|                                        |                                                          |         |           |         |          |            | (0.70)     |          |
| <i>Africa</i>                          |                                                          |         |           | -5.275  | -6.919   | -3.759     | 1.703      | -6.459   |
|                                        |                                                          |         |           | (-0.96) | (-1.29)  | (-0.75)    | (0.33)     | (-1.29)  |
| <i>Asia</i>                            |                                                          |         |           | -7.725  | -6.576   | -3.502     | -8.055**   | -6.634   |
|                                        |                                                          |         |           | (-1.48) | (-1.36)  | (-1.29)    | (-2.26)    | (-1.49)  |
| <i>Europe</i>                          |                                                          |         |           | -3.425  | -2.198   | -5.690**   | -10.109**  | -3.495   |
|                                        |                                                          |         |           | (-0.60) | (-0.42)  | (-2.01)    | (-2.06)    | (-0.71)  |
| <i>North America</i>                   |                                                          |         |           | -5.675  | -7.453   | -10.780*** | -12.749*** | -7.023   |
|                                        |                                                          |         |           | (-0.99) | (-1.39)  | (-3.02)    | (-3.15)    | (-1.39)  |
| <i>South America</i>                   |                                                          |         |           | -4.010  | -4.755   | -4.323     | -8.091*    | -4.239   |
|                                        |                                                          |         |           | (-0.64) | (-0.80)  | (-0.91)    | (-1.71)    | (-0.75)  |
| <i>Constant</i>                        | -7.361                                                   | -6.899  | -12.955** | -6.108  | 14.939   | -7.264     | -10.918    | 13.063   |
|                                        | (-1.65)                                                  | (-1.46) | (-2.03)   | (-0.61) | (0.86)   | (-0.26)    | (-0.30)    | (0.94)   |
| Adj. R-squared                         | 0.022                                                    | 0.015   | 0.027     | 0.033   | 0.081    | 0.066      | 0.081      | 0.110    |
| Countries                              | 114                                                      | 114     | 114       | 114     | 114      | 85         | 71         | 114      |

The method of estimation is ordinary least squares. *t* statistics based on heteroscedasticity-robust standard errors are reported in parentheses. \*\*\*p < 0.01, \*\*p < 0.05, \*p < 0.1.

**Table A3.** Absolute change of ICRG internal conflict risk score (2020-21) and (log) confirmed COVID-19 cases per million people

|                                        | (1)                                                           | (2)               | (3)               | (4)               | (5)                | (6)                  | (7)                  | (8)                |
|----------------------------------------|---------------------------------------------------------------|-------------------|-------------------|-------------------|--------------------|----------------------|----------------------|--------------------|
|                                        | Dependent variable: <i>Conflict growth (absolute)</i> (point) |                   |                   |                   |                    |                      |                      |                    |
| <i>COVID_case</i>                      | 0.027<br>(1.63)                                               | 0.030*<br>(1.79)  | 0.039<br>(1.59)   | 0.036<br>(1.19)   | 0.050<br>(1.60)    | 0.072**<br>(2.42)    | 0.217***<br>(3.30)   | 0.065**<br>(2.38)  |
| <i>Gov_Support</i>                     |                                                               | -0.001<br>(-0.42) | 0.015<br>(0.61)   | 0.023<br>(0.78)   | 0.036<br>(1.49)    | 0.027<br>(0.80)      | 0.065<br>(1.61)      | 0.040<br>(1.66)    |
| <i>COVID_case</i> × <i>Gov_support</i> |                                                               |                   | -0.001<br>(-0.64) | -0.002<br>(-0.83) | -0.003<br>(-1.50)  | -0.002<br>(-0.84)    | -0.006*<br>(-1.68)   | -0.004<br>(-1.60)  |
| <i>Inflation</i>                       |                                                               |                   |                   |                   | 0.009***<br>(3.67) | 0.004<br>(0.37)      | -0.008<br>(-0.62)    | 0.008***<br>(4.09) |
| <i>HCI</i>                             |                                                               |                   |                   |                   | -0.204<br>(-0.41)  | -0.024<br>(-0.04)    | 1.572*<br>(1.68)     |                    |
| <i>Oil_rent</i>                        |                                                               |                   |                   |                   | 0.001<br>(0.16)    | -0.035***<br>(-3.24) | -0.033***<br>(-3.03) |                    |
| <i>Urbanization</i>                    |                                                               |                   |                   |                   | 0.001<br>(0.48)    | 0.003<br>(1.22)      | 0.004<br>(1.39)      |                    |
| <i>log of GDP per capita</i>           |                                                               |                   |                   |                   | -0.088<br>(-1.18)  | -0.012<br>(-0.13)    | -0.265*<br>(-1.92)   | -0.064<br>(-1.37)  |
| <i>Level of conflict 2020</i>          |                                                               |                   |                   |                   | -0.039<br>(-1.35)  | -0.015<br>(-0.50)    | -0.016<br>(-0.57)    | -0.036<br>(-1.32)  |
| <i>Governance</i>                      |                                                               |                   |                   |                   | 0.043<br>(0.52)    | -0.042<br>(-0.46)    | -0.199*<br>(-1.87)   |                    |
| <i>Stringency index</i>                |                                                               |                   |                   |                   | 0.005<br>(1.46)    | 0.006<br>(1.51)      | 0.007<br>(1.58)      |                    |
| <i>Gini index</i>                      |                                                               |                   |                   |                   |                    | -0.005<br>(-0.80)    | -0.001<br>(-0.13)    |                    |
| <i>Ethnic fractionalization</i>        |                                                               |                   |                   |                   |                    | 0.053<br>(0.30)      | -0.047<br>(-0.29)    |                    |
| <i>Trust in government</i>             |                                                               |                   |                   |                   |                    |                      | 0.005*<br>(1.71)     |                    |
| <i>Trust in science</i>                |                                                               |                   |                   |                   |                    |                      | 0.006<br>(1.07)      |                    |
| <i>Africa</i>                          |                                                               |                   |                   | -0.029<br>(-0.15) | -0.074<br>(-0.40)  | -0.041<br>(-0.19)    | 0.237<br>(1.29)      | -0.058<br>(-0.32)  |
| <i>Asia</i>                            |                                                               |                   |                   | -0.110<br>(-0.62) | -0.086<br>(-0.51)  | -0.068<br>(-0.74)    | -0.270**<br>(-2.06)  | -0.073<br>(-0.46)  |
| <i>Europe</i>                          |                                                               |                   |                   | 0.032<br>(0.16)   | 0.096<br>(0.49)    | -0.131<br>(-1.37)    | -0.278<br>(-1.66)    | 0.044<br>(0.24)    |
| <i>North America</i>                   |                                                               |                   |                   | -0.020<br>(-0.10) | -0.058<br>(-0.32)  | -0.279**<br>(-2.28)  | -0.380***<br>(-2.86) | -0.039<br>(-0.22)  |
| <i>South America</i>                   |                                                               |                   |                   | 0.043<br>(0.19)   | 0.005<br>(0.02)    | -0.097<br>(-0.54)    | -0.241<br>(-1.45)    | 0.043<br>(0.21)    |
| <i>Constant</i>                        | -0.261<br>(-1.46)                                             | -0.277<br>(-1.56) | -0.375<br>(-1.42) | -0.304<br>(-0.78) | 0.287<br>(0.42)    | -0.749<br>(-0.72)    | -1.528<br>(-1.22)    | 0.096<br>(0.18)    |
| Adj. R-squared                         | 0.016                                                         | 0.009             | 0.003             | -0.010            | 0.047              | 0.060                | 0.147                | 0.069              |
| Countries                              | 114                                                           | 114               | 114               | 114               | 114                | 85                   | 71                   | 114                |

The method of estimation is ordinary least squares. *t* statistics based on heteroscedasticity-robust standard errors are reported in parentheses. \*\*\*p < 0.01, \*\*p < 0.05, \*p < 0.1.

**Table A4.** Relative development of ICRG internal conflict risk score (2020-21) and (log) confirmed COVID-19 death per million of population, excluding 13 countries with no change in internal conflict

|                                  | (1)                                                      | (2)     | (3)        | (4)     | (5)      | (6)        | (7)       | (8)      |
|----------------------------------|----------------------------------------------------------|---------|------------|---------|----------|------------|-----------|----------|
|                                  | Dependent variable: <i>Conflict growth (relative, %)</i> |         |            |         |          |            |           |          |
| <i>COVID_death</i>               | 1.109**                                                  | 1.022*  | 1.796***   | 1.931** | 2.298**  | 2.543***   | 4.447***  | 2.570*** |
|                                  | (2.14)                                                   | (1.75)  | (2.95)     | (2.62)  | (2.51)   | (2.96)     | (2.78)    | (3.26)   |
| <i>Gov_Support</i>               |                                                          | 0.056   | 0.652      | 0.573   | 0.688*   | 0.496      | 1.281*    | 0.712*   |
|                                  |                                                          | (0.51)  | (1.24)     | (1.26)  | (1.67)   | (1.06)     | (2.01)    | (1.81)   |
| <i>COVID_death × Gov_support</i> |                                                          |         | -0.092     | -0.090  | -0.104*  | -0.068     | -0.172*   | -0.102*  |
|                                  |                                                          |         | (-1.23)    | (-1.33) | (-1.72)  | (-0.98)    | (-1.92)   | (-1.75)  |
| <i>Inflation</i>                 |                                                          |         |            |         | 0.172*** | -0.058     | -0.102    | 0.164*** |
|                                  |                                                          |         |            |         | (3.47)   | (-0.18)    | (-0.31)   | (4.93)   |
| <i>HCI</i>                       |                                                          |         |            |         | -16.725  | -11.823    | 36.338    |          |
|                                  |                                                          |         |            |         | (-1.13)  | (-0.69)    | (1.38)    |          |
| <i>Oil_rent</i>                  |                                                          |         |            |         | -0.038   | -1.087***  | -0.916**  |          |
|                                  |                                                          |         |            |         | (-0.34)  | (-3.52)    | (-2.65)   |          |
| <i>Urbanization</i>              |                                                          |         |            |         | 0.041    | 0.086      | 0.106     |          |
|                                  |                                                          |         |            |         | (0.60)   | (1.04)     | (1.09)    |          |
| <i>log of GDP per capita</i>     |                                                          |         |            |         | -2.782   | 0.515      | -6.347    | -2.553*  |
|                                  |                                                          |         |            |         | (-1.05)  | (0.16)     | (-1.43)   | (-1.81)  |
| <i>Level of conflict 2020</i>    |                                                          |         |            |         | -2.037** | -1.788*    | -2.603**  | -2.073** |
|                                  |                                                          |         |            |         | (-2.19)  | (-1.75)    | (-2.12)   | (-2.35)  |
| <i>Governance</i>                |                                                          |         |            |         | 1.685    | -1.498     | -4.518    |          |
|                                  |                                                          |         |            |         | (0.69)   | (-0.59)    | (-1.17)   |          |
| <i>Stringency index</i>          |                                                          |         |            |         | 0.073    | 0.090      | 0.134     |          |
|                                  |                                                          |         |            |         | (0.81)   | (0.92)     | (1.14)    |          |
| <i>Gini index</i>                |                                                          |         |            |         |          | -0.071     | 0.051     |          |
|                                  |                                                          |         |            |         |          | (-0.32)    | (0.24)    |          |
| <i>Ethnic fractionalization</i>  |                                                          |         |            |         |          | 1.259      | -1.538    |          |
|                                  |                                                          |         |            |         |          | (0.25)     | (-0.30)   |          |
| <i>Trust in government</i>       |                                                          |         |            |         |          |            | 0.055     |          |
|                                  |                                                          |         |            |         |          |            | (0.58)    |          |
| <i>Trust in science</i>          |                                                          |         |            |         |          |            | 0.110     |          |
|                                  |                                                          |         |            |         |          |            | (0.64)    |          |
| <i>Africa</i>                    |                                                          |         |            | -5.682  | -8.284   | -2.735     | 5.516     | -7.101   |
|                                  |                                                          |         |            | (-0.97) | (-1.45)  | (-0.45)    | (0.68)    | (-1.34)  |
| <i>Asia</i>                      |                                                          |         |            | -8.955  | -7.213   | -3.178     | -3.065    | -7.665   |
|                                  |                                                          |         |            | (-1.55) | (-1.37)  | (-0.91)    | (-0.49)   | (-1.56)  |
| <i>Europe</i>                    |                                                          |         |            | -5.132  | -3.657   | -7.084**   | -7.276    | -5.730   |
|                                  |                                                          |         |            | (-0.84) | (-0.64)  | (-2.12)    | (-1.28)   | (-1.08)  |
| <i>North America</i>             |                                                          |         |            | -7.514  | -10.002  | -14.652*** | -13.121** | -9.793*  |
|                                  |                                                          |         |            | (-1.18) | (-1.61)  | (-2.80)    | (-2.07)   | (-1.73)  |
| <i>South America</i>             |                                                          |         |            | -7.218  | -8.684   | -8.099     | -9.140    | -8.104   |
|                                  |                                                          |         |            | (-1.11) | (-1.37)  | (-1.47)    | (-1.24)   | (-1.37)  |
| <i>Constant</i>                  | -5.468                                                   | -5.473* | -10.087*** | -3.870  | 31.131   | -6.351     | 2.393     | 24.242   |
|                                  | (-1.62)                                                  | (-1.67) | (-2.73)    | (-0.50) | (1.46)   | (-0.20)    | (0.05)    | (1.61)   |
| Adj. R-squared                   | 0.040                                                    | 0.034   | 0.051      | 0.050   | 0.108    | 0.094      | 0.077     | 0.137    |
| Countries                        | 101                                                      | 101     | 101        | 101     | 101      | 76         | 64        | 101      |

The method of estimation is ordinary least squares. *t* statistics based on heteroscedasticity-robust standard errors are reported in parentheses. \*\*\*p < 0.01, \*\*p < 0.05, \*p < 0.1. Excluded countries from estimation (with no change in their internal conflict risk evaluation by ICRG): Botswana, Brunei Darussalam, Canada, Egypt, Iceland, Italy, Jamaica, Japan, Jordan, Moldova, Norway, Korea, and Zambia.

**Table A5.** Absolute change of ICRG civil disorder risk score (2020-21) and (log) confirmed COVID-19 death rate per million

|                                        | (1)                                                                 | (2)                 | (3)                  | (4)                | (5)                  | (6)                  | (7)                  | (8)                  |
|----------------------------------------|---------------------------------------------------------------------|---------------------|----------------------|--------------------|----------------------|----------------------|----------------------|----------------------|
|                                        | Dependent variable: <i>Civil disorder growth (absolute)</i> (point) |                     |                      |                    |                      |                      |                      |                      |
| <i>COVID_death</i>                     | 0.037***<br>(2.83)                                                  | 0.035**<br>(2.56)   | 0.048***<br>(2.91)   | 0.066***<br>(3.19) | 0.066***<br>(3.22)   | 0.085***<br>(3.65)   | 0.134***<br>(3.34)   | 0.076***<br>(4.13)   |
| <i>Gov_Support</i>                     |                                                                     | 0.001<br>(0.70)     | 0.012**<br>(2.04)    | 0.016*<br>(1.95)   | 0.013*<br>(1.70)     | 0.010<br>(0.91)      | 0.025<br>(1.49)      | 0.013*<br>(1.80)     |
| <i>COVID_death × Gov_support</i>       |                                                                     |                     | -0.002*<br>(-1.91)   | -0.002*<br>(-1.80) | -0.002<br>(-1.65)    | -0.001<br>(-0.89)    | -0.004<br>(-1.57)    | -0.002*<br>(-1.76)   |
| <i>Inflation</i>                       |                                                                     |                     |                      |                    | 0.003**<br>(2.57)    | -0.005<br>(-0.55)    | -0.012<br>(-1.23)    | 0.004***<br>(3.77)   |
| <i>HCI</i>                             |                                                                     |                     |                      |                    | -0.095<br>(-0.26)    | -0.008<br>(-0.02)    | 0.787<br>(1.23)      |                      |
| <i>Oil_rent</i>                        |                                                                     |                     |                      |                    | -0.003<br>(-1.21)    | -0.012<br>(-1.54)    | -0.012<br>(-1.19)    |                      |
| <i>Urbanization</i>                    |                                                                     |                     |                      |                    | 0.001<br>(0.65)      | 0.002<br>(1.14)      | 0.003<br>(1.28)      |                      |
| <i>log of GDP per capita</i>           |                                                                     |                     |                      |                    | -0.070<br>(-1.49)    | -0.081<br>(-1.09)    | -0.178<br>(-1.55)    | -0.102***<br>(-2.98) |
| <i>Level of civil disorder in 2020</i> |                                                                     |                     |                      |                    | -0.381***<br>(-5.18) | -0.385***<br>(-3.82) | -0.421***<br>(-3.76) | -0.354***<br>(-4.93) |
| <i>Governance</i>                      |                                                                     |                     |                      |                    | -0.062<br>(-1.50)    | -0.069<br>(-1.13)    | -0.132<br>(-1.53)    |                      |
| <i>Stringency index</i>                |                                                                     |                     |                      |                    | 0.002<br>(0.97)      | 0.001<br>(0.37)      | 0.002<br>(0.63)      |                      |
| <i>Gini index</i>                      |                                                                     |                     |                      |                    |                      | -0.008<br>(-1.66)    | -0.003<br>(-0.73)    |                      |
| <i>Ethnic fractionalization</i>        |                                                                     |                     |                      |                    |                      | -0.055<br>(-0.40)    | -0.117<br>(-0.80)    |                      |
| <i>Trust in government</i>             |                                                                     |                     |                      |                    |                      |                      | 0.002<br>(0.83)      |                      |
| <i>Trust in science</i>                |                                                                     |                     |                      |                    |                      |                      | 0.002<br>(0.39)      |                      |
| <i>Africa</i>                          |                                                                     |                     |                      | 0.065<br>(0.43)    | -0.025<br>(-0.20)    | -0.049<br>(-0.32)    | 0.166<br>(0.93)      | -0.013<br>(-0.10)    |
| <i>Asia</i>                            |                                                                     |                     |                      | -0.036<br>(-0.25)  | -0.048<br>(-0.41)    | -0.081<br>(-1.11)    | -0.080<br>(-0.64)    | -0.009<br>(-0.08)    |
| <i>Europe</i>                          |                                                                     |                     |                      | -0.042<br>(-0.28)  | -0.034<br>(-0.26)    | -0.256***<br>(-2.97) | -0.242*<br>(-1.73)   | -0.042<br>(-0.33)    |
| <i>North America</i>                   |                                                                     |                     |                      | -0.041<br>(-0.25)  | -0.111<br>(-0.85)    | -0.293***<br>(-3.17) | -0.304**<br>(-2.40)  | -0.071<br>(-0.53)    |
| <i>South America</i>                   |                                                                     |                     |                      | -0.022<br>(-0.12)  | -0.015<br>(-0.10)    | -0.102<br>(-0.79)    | -0.146<br>(-0.94)    | 0.007<br>(0.04)      |
| <i>Constant</i>                        | -0.186**<br>(-2.30)                                                 | -0.185**<br>(-2.30) | -0.270***<br>(-2.69) | -0.373*<br>(-1.83) | 1.132**<br>(2.41)    | 1.503<br>(1.60)      | 1.261<br>(0.98)      | 1.367***<br>(3.14)   |
| Adj. R-squared                         | 0.065                                                               | 0.060               | 0.064                | 0.044              | 0.233                | 0.235                | 0.258                | 0.249                |
| Countries                              | 114                                                                 | 114                 | 114                  | 114                | 114                  | 85                   | 71                   | 114                  |

The method of estimation is ordinary least squares. *t* statistics based on heteroscedasticity-robust standard errors are reported in parentheses. \*\*\*p < 0.01, \*\*p < 0.05, \*p < 0.1.

**Table A6.** Relative change of ICRG civil disorder risk score (2020-21) and (log) confirmed COVID-19 cases per million people

|                                        | (1)                                                            | (2)                  | (3)                  | (4)                | (5)                   | (6)                   | (7)                   | (8)                   |
|----------------------------------------|----------------------------------------------------------------|----------------------|----------------------|--------------------|-----------------------|-----------------------|-----------------------|-----------------------|
|                                        | Dependent variable: <i>Civil disorder growth</i> (relative, %) |                      |                      |                    |                       |                       |                       |                       |
| <i>COVID_case</i>                      | 1.415***<br>(3.01)                                             | 1.275**<br>(2.48)    | 1.546**<br>(2.33)    | 1.930**<br>(2.23)  | 1.830**<br>(2.03)     | 2.513**<br>(2.26)     | 6.684**<br>(2.57)     | 2.339***<br>(2.83)    |
| <i>Gov_Support</i>                     |                                                                | 0.058<br>(0.81)      | 0.535<br>(0.73)      | 0.662<br>(0.81)    | 0.393<br>(0.52)       | -0.330<br>(-0.30)     | 1.592<br>(1.05)       | 0.369<br>(0.53)       |
| <i>COVID_case</i> × <i>Gov_support</i> |                                                                |                      | -0.043<br>(-0.66)    | -0.054<br>(-0.75)  | -0.034<br>(-0.52)     | 0.029<br>(0.29)       | -0.141<br>(-1.05)     | -0.032<br>(-0.53)     |
| <i>Inflation</i>                       |                                                                |                      |                      |                    | 0.134***<br>(2.87)    | -0.316<br>(-0.83)     | -0.686<br>(-1.54)     | 0.172***<br>(4.50)    |
| <i>HCI</i>                             |                                                                |                      |                      |                    | -12.096<br>(-0.71)    | -2.751<br>(-0.13)     | 42.509<br>(1.23)      |                       |
| <i>Oil_rent</i>                        |                                                                |                      |                      |                    | -0.215*<br>(-1.79)    | -0.705*<br>(-1.96)    | -0.720<br>(-1.48)     |                       |
| <i>Urbanization</i>                    |                                                                |                      |                      |                    | 0.021<br>(0.34)       | 0.056<br>(0.73)       | 0.072<br>(0.74)       |                       |
| <i>log of GDP per capita</i>           |                                                                |                      |                      |                    | -2.197<br>(-1.09)     | -2.592<br>(-0.87)     | -8.279*<br>(-1.83)    | -4.852***<br>(-3.09)  |
| <i>Level of civil disorder 2020</i>    |                                                                |                      |                      |                    | -18.293***<br>(-5.99) | -19.784***<br>(-4.62) | -18.463***<br>(-3.83) | -16.466***<br>(-5.47) |
| <i>Governance</i>                      |                                                                |                      |                      |                    | -2.953<br>(-1.64)     | -4.900*<br>(-1.83)    | -9.079**<br>(-2.28)   |                       |
| <i>Stringency index</i>                |                                                                |                      |                      |                    | 0.117<br>(1.53)       | 0.043<br>(0.35)       | 0.053<br>(0.37)       |                       |
| <i>Gini index</i>                      |                                                                |                      |                      |                    |                       | -0.296<br>(-1.42)     | -0.211<br>(-1.05)     |                       |
| <i>Ethnic fractionalization</i>        |                                                                |                      |                      |                    |                       | -1.039<br>(-0.17)     | -3.535<br>(-0.55)     |                       |
| <i>Trust in government</i>             |                                                                |                      |                      |                    |                       |                       | 0.117<br>(1.05)       |                       |
| <i>Trust in science</i>                |                                                                |                      |                      |                    |                       |                       | 0.077<br>(0.46)       |                       |
| <i>Africa</i>                          |                                                                |                      |                      | -0.560<br>(-0.08)  | -4.496<br>(-0.75)     | -5.474<br>(-0.78)     | 5.036<br>(0.65)       | -3.757<br>(-0.67)     |
| <i>Asia</i>                            |                                                                |                      |                      | -4.542<br>(-0.70)  | -5.004<br>(-0.95)     | -5.990*<br>(-1.92)    | -8.082*<br>(-1.71)    | -2.923<br>(-0.59)     |
| <i>Europe</i>                          |                                                                |                      |                      | -2.647<br>(-0.39)  | -1.849<br>(-0.33)     | -11.236***<br>(-3.62) | -13.392**<br>(-2.41)  | -2.069<br>(-0.39)     |
| <i>North America</i>                   |                                                                |                      |                      | -3.333<br>(-0.46)  | -6.723<br>(-1.16)     | -13.498***<br>(-3.24) | -14.196***<br>(-2.75) | -4.044<br>(-0.71)     |
| <i>South America</i>                   |                                                                |                      |                      | -0.629<br>(-0.07)  | 0.114<br>(0.02)       | -2.120<br>(-0.36)     | -3.905<br>(-0.61)     | 1.730<br>(0.24)       |
| <i>Constant</i>                        | -12.239**<br>(-2.52)                                           | -11.348**<br>(-2.25) | -14.191**<br>(-2.12) | -15.621<br>(-1.28) | 50.288**<br>(2.28)    | 65.336<br>(1.60)      | 31.992<br>(0.61)      | 64.739***<br>(3.11)   |
| Adj. R-squared                         | 0.052                                                          | 0.047                | 0.042                | 0.019              | 0.258                 | 0.280                 | 0.277                 | 0.252                 |
| Countries                              | 114                                                            | 114                  | 114                  | 114                | 114                   | 85                    | 71                    | 114                   |

The method of estimation is ordinary least squares. *t* statistics based on heteroscedasticity-robust standard errors are reported in parentheses. \*\*\**p* < 0.01, \*\**p* < 0.05, \**p* < 0.1.

**Table A7.** Absolute change of ICRG civil disorder risk score (2020-21) and (log) confirmed COVID-19 cases per million people

|                                                                     | (1)                 | (2)                 | (3)                | (4)               | (5)                  | (6)                  | (7)                  | (8)                  |
|---------------------------------------------------------------------|---------------------|---------------------|--------------------|-------------------|----------------------|----------------------|----------------------|----------------------|
| Dependent variable: <i>Civil disorder growth (absolute)</i> (point) |                     |                     |                    |                   |                      |                      |                      |                      |
| <i>COVID_case</i>                                                   | 0.030***<br>(2.65)  | 0.028**<br>(2.31)   | 0.032*<br>(1.96)   | 0.045**<br>(2.04) | 0.048**<br>(2.21)    | 0.066**<br>(2.60)    | 0.168***<br>(2.74)   | 0.058***<br>(2.81)   |
| <i>Gov_Support</i>                                                  |                     | 0.001<br>(0.52)     | 0.008<br>(0.53)    | 0.013<br>(0.69)   | 0.010<br>(0.57)      | 0.001<br>(0.02)      | 0.043<br>(1.20)      | 0.010<br>(0.58)      |
| <i>COVID_case</i> × <i>Gov_support</i>                              |                     |                     | -0.001<br>(-0.49)  | -0.001<br>(-0.62) | -0.001<br>(-0.54)    | -0.000<br>(-0.01)    | -0.004<br>(-1.20)    | -0.001<br>(-0.55)    |
| <i>Inflation</i>                                                    |                     |                     |                    | 0.051<br>(0.31)   | -0.031<br>(-0.22)    | -0.056<br>(-0.33)    | 0.185<br>(1.05)      | -0.020<br>(-0.14)    |
| <i>HCI</i>                                                          |                     |                     |                    | -0.043<br>(-0.28) | -0.066<br>(-0.52)    | -0.095<br>(-1.31)    | -0.164<br>(-1.53)    | -0.007<br>(-0.05)    |
| <i>Oil_rent</i>                                                     |                     |                     |                    | -0.031<br>(-0.19) | -0.023<br>(-0.17)    | -0.238***<br>(-3.19) | -0.300**<br>(-2.30)  | -0.016<br>(-0.12)    |
| <i>Urbanization</i>                                                 |                     |                     |                    | -0.017<br>(-0.10) | -0.094<br>(-0.69)    | -0.260***<br>(-2.80) | -0.293**<br>(-2.59)  | -0.031<br>(-0.22)    |
| log of GDP per capita                                               |                     |                     |                    | 0.039<br>(0.19)   | 0.041<br>(0.25)      | -0.023<br>(-0.16)    | -0.082<br>(-0.57)    | 0.085<br>(0.49)      |
| <i>Level of civil disorder 2020</i>                                 |                     |                     |                    |                   | 0.003**<br>(2.62)    | -0.006<br>(-0.65)    | -0.016<br>(-1.49)    | 0.004***<br>(3.81)   |
| <i>Governance</i>                                                   |                     |                     |                    |                   | -0.087<br>(-0.22)    | 0.059<br>(0.11)      | 1.024<br>(1.29)      |                      |
| <i>Stringency index</i>                                             |                     |                     |                    |                   | -0.004<br>(-1.44)    | -0.015*<br>(-1.73)   | -0.016<br>(-1.43)    |                      |
| <i>Gini index</i>                                                   |                     |                     |                    |                   | 0.001<br>(0.42)      | 0.002<br>(0.83)      | 0.002<br>(0.86)      |                      |
| <i>Ethnic fractionalization</i>                                     |                     |                     |                    |                   | -0.061<br>(-1.29)    | -0.071<br>(-0.98)    | -0.198*<br>(-1.84)   | -0.107***<br>(-2.94) |
| <i>Trust in government</i>                                          |                     |                     |                    |                   | -0.377***<br>(-5.02) | -0.387***<br>(-3.70) | -0.385***<br>(-3.14) | -0.336***<br>(-4.59) |
| <i>Trust in science</i>                                             |                     |                     |                    |                   | -0.078*<br>(-1.81)   | -0.110<br>(-1.67)    | -0.215**<br>(-2.33)  |                      |
| <i>Africa</i>                                                       |                     |                     |                    |                   | 0.003<br>(1.45)      | 0.002<br>(0.56)      | 0.002<br>(0.52)      |                      |
| <i>Asia</i>                                                         |                     |                     |                    |                   |                      | -0.007<br>(-1.44)    | -0.005<br>(-0.96)    |                      |
| <i>Europe</i>                                                       |                     |                     |                    |                   |                      | -0.051<br>(-0.35)    | -0.105<br>(-0.70)    |                      |
| <i>North America</i>                                                |                     |                     |                    |                   |                      |                      | 0.003<br>(1.03)      |                      |
| <i>South America</i>                                                |                     |                     |                    |                   |                      |                      | 0.003<br>(0.65)      |                      |
| <i>Constant</i>                                                     | -0.272**<br>(-2.25) | -0.260**<br>(-2.10) | -0.303*<br>(-1.79) | -0.431<br>(-1.44) | 0.908*<br>(1.73)     | 1.196<br>(1.23)      | 0.398<br>(0.32)      | 1.240**<br>(2.51)    |
| Adj. R-squared                                                      | 0.045               | 0.037               | 0.030              | 0.005             | 0.202                | 0.202                | 0.252                | 0.202                |
| Countries                                                           | 114                 | 114                 | 114                | 114               | 114                  | 85                   | 71                   | 114                  |

The method of estimation is ordinary least squares. *t* statistics based on heteroscedasticity-robust standard errors are reported in parentheses. \*\*\*p < 0.01, \*\*p < 0.05, \*p < 0.1.



**Table A8.** Relative development of ICRG civil disorder risk score (2020-21) and (log) confirmed COVID-19 death per million of population, excluding 17 countries with no change in civil disorder

|                                        | (1)                                                            | (2)                 | (3)                   | (4)                 | (5)                   | (6)                   | (7)                   | (8)                   |
|----------------------------------------|----------------------------------------------------------------|---------------------|-----------------------|---------------------|-----------------------|-----------------------|-----------------------|-----------------------|
|                                        | Dependent variable: <i>Civil disorder growth (relative, %)</i> |                     |                       |                     |                       |                       |                       |                       |
| <i>COVID_death</i>                     | 1.799***<br>(2.94)                                             | 1.680**<br>(2.53)   | 2.540***<br>(3.42)    | 3.251***<br>(3.57)  | 3.298***<br>(3.58)    | 4.188***<br>(4.52)    | 5.584***<br>(2.94)    | 3.638***<br>(4.13)    |
| <i>Gov_Support</i>                     |                                                                | 0.064<br>(0.76)     | 0.754***<br>(2.66)    | 0.877**<br>(2.38)   | 0.653*<br>(1.80)      | 0.515<br>(0.93)       | 1.612*<br>(1.85)      | 0.588*<br>(1.80)      |
| <i>COVID_death × Gov_support</i>       |                                                                |                     | -0.102**<br>(-2.51)   | -0.119**<br>(-2.29) | -0.088*<br>(-1.73)    | -0.071<br>(-0.92)     | -0.224*<br>(-1.89)    | -0.082*<br>(-1.84)    |
| <i>Inflation</i>                       |                                                                |                     |                       |                     | 0.111**<br>(2.25)     | -0.471<br>(-1.05)     | -0.709<br>(-1.48)     | 0.149***<br>(4.25)    |
| <i>HCI</i>                             |                                                                |                     |                       |                     | -13.012<br>(-0.69)    | -5.960<br>(-0.26)     | 55.385<br>(1.57)      |                       |
| <i>Oil_rent</i>                        |                                                                |                     |                       |                     | -0.205<br>(-1.15)     | -1.018***<br>(-2.69)  | -0.991*<br>(-1.99)    |                       |
| <i>Urbanization</i>                    |                                                                |                     |                       |                     | 0.023<br>(0.36)       | 0.056<br>(0.70)       | 0.072<br>(0.71)       |                       |
| <i>log of GDP per capita</i>           |                                                                |                     |                       |                     | -1.949<br>(-0.70)     | -0.854<br>(-0.25)     | -4.668<br>(-0.96)     | -4.732***<br>(-2.75)  |
| <i>Level of civil disorder in 2020</i> |                                                                |                     |                       |                     | -19.503***<br>(-6.38) | -21.268***<br>(-4.81) | -21.698***<br>(-4.60) | -18.536***<br>(-6.02) |
| <i>Governance</i>                      |                                                                |                     |                       |                     | -3.237<br>(-1.35)     | -4.542<br>(-1.53)     | -10.474**<br>(-2.28)  |                       |
| <i>Stringency index</i>                |                                                                |                     |                       |                     | 0.052<br>(0.60)       | 0.014<br>(0.12)       | 0.054<br>(0.36)       |                       |
| <i>Gini index</i>                      |                                                                |                     |                       |                     |                       | -0.482*<br>(-1.74)    | -0.338<br>(-1.28)     |                       |
| <i>Ethnic fractionalization</i>        |                                                                |                     |                       |                     |                       | -2.209<br>(-0.37)     | -4.731<br>(-0.76)     |                       |
| <i>Trust in government</i>             |                                                                |                     |                       |                     |                       |                       | 0.070<br>(0.61)       |                       |
| <i>Trust in science</i>                |                                                                |                     |                       |                     |                       |                       | 0.101<br>(0.54)       |                       |
| <i>Africa</i>                          |                                                                |                     |                       | 1.299<br>(0.21)     | -2.622<br>(-0.49)     | 2.749<br>(0.38)       | 16.961*<br>(1.69)     | -1.802<br>(-0.39)     |
| <i>Asia</i>                            |                                                                |                     |                       | -4.041<br>(-0.65)   | -4.734<br>(-0.96)     | -2.417<br>(-0.60)     | 1.167<br>(0.15)       | -2.998<br>(-0.68)     |
| <i>Europe</i>                          |                                                                |                     |                       | -2.851<br>(-0.42)   | -4.181<br>(-0.72)     | -13.647***<br>(-3.08) | -9.685<br>(-1.37)     | -4.242<br>(-0.86)     |
| <i>North America</i>                   |                                                                |                     |                       | -3.845<br>(-0.53)   | -7.727<br>(-1.34)     | -11.656**<br>(-2.11)  | -6.792<br>(-0.90)     | -5.115<br>(-0.96)     |
| <i>South America</i>                   |                                                                |                     |                       | -1.321<br>(-0.14)   | -1.331<br>(-0.18)     | -0.323<br>(-0.04)     | 4.668<br>(0.51)       | -0.757<br>(-0.10)     |
| <i>Constant</i>                        | -8.216**<br>(-2.18)                                            | -8.131**<br>(-2.18) | -13.477***<br>(-3.17) | -15.802*<br>(-1.86) | 53.665**<br>(2.20)    | 61.343<br>(1.42)      | 30.511<br>(0.52)      | 71.002***<br>(3.65)   |
| Adj. R-squared                         | 0.074                                                          | 0.069               | 0.085                 | 0.063               | 0.306                 | 0.355                 | 0.351                 | 0.323                 |
| Countries                              | 97                                                             | 97                  | 97                    | 97                  | 97                    | 74                    | 62                    | 97                    |

The method of estimation is ordinary least squares. *t* statistics based on heteroscedasticity-robust standard errors are reported in parentheses. \*\*\**p* < 0.01, \*\**p* < 0.05, \**p* < 0.1.

## **Appendix B.**

**Table B1.** List of 114 countries in Model 8 of Table 3

|                   |                    |               |                  |                    |                      |
|-------------------|--------------------|---------------|------------------|--------------------|----------------------|
| Albania           | Costa Rica         | Haiti         | Luxembourg       | Philippines        | Tanzania             |
| Algeria           | Cote d'Ivoire      | Honduras      | Madagascar       | Poland             | Thailand             |
| Australia         | Croatia            | Hong Kong SAR | Malawi           | Portugal           | Togo                 |
| Austria           | Cyprus             | Hungary       | Malaysia         | Qatar              | Trinidad and Tobago  |
| Azerbaijan        | Czech Republic     | Iceland       | Mali             | Romania            | Tunisia              |
| Bahrain           | Denmark            | India         | Malta            | Russian Federation | Turkey               |
| Bangladesh        | Dominican Republic | Indonesia     | Mexico           | Saudi Arabia       | Uganda               |
| Belarus           | Ecuador            | Iraq          | Moldova          | Senegal            | Ukraine              |
| Belgium           | Egypt              | Ireland       | Mongolia         | Serbia             | United Arab Emirates |
| Botswana          | El Salvador        | Israel        | Morocco          | Sierra Leone       | United Kingdom       |
| Brazil            | Estonia            | Italy         | Netherlands      | Singapore          | United States        |
| Brunei Darussalam | Finland            | Jamaica       | New Zealand      | Slovak Republic    | Uruguay              |
| Bulgaria          | France             | Japan         | Nicaragua        | Slovenia           | Vietnam              |
| Burkina Faso      | Gabon              | Jordan        | Norway           | South Africa       | Zambia               |
| Cameroon          | Gambia             | Kazakhstan    | Oman             | Korea              |                      |
| Canada            | Germany            | Kenya         | Pakistan         | Spain              |                      |
| Chile             | Ghana              | Kuwait        | Panama           | Sri Lanka          |                      |
| China             | Greece             | Latvia        | Papua New Guinea | Sudan              |                      |
| Colombia          | Guatemala          | Lebanon       | Paraguay         | Sweden             |                      |
| Congo             | Guinea             | Lithuania     | Peru             | Switzerland        |                      |

**Table B2.** List of 110 countries in Model 1 of Table 4

|                   |                    |               |                  |                     |                      |
|-------------------|--------------------|---------------|------------------|---------------------|----------------------|
| Albania           | Cote d'Ivoire      | Honduras      | Malawi           | Qatar               | Tunisia              |
| Algeria           | Croatia            | Hong Kong SAR | Malaysia         | Romania             | Turkey               |
| Austria           | Cyprus             | Hungary       | Mali             | Russian Federation  | Uganda               |
| Azerbaijan        | Czech Republic     | India         | Malta            | Saudi Arabia        | Ukraine              |
| Bahrain           | Denmark            | Indonesia     | Mexico           | Senegal             | United Arab Emirates |
| Bangladesh        | Dominican Republic | Iraq          | Moldova          | Serbia              | United Kingdom       |
| Belarus           | Ecuador            | Ireland       | Mongolia         | Singapore           | United States        |
| Belgium           | Egypt              | Israel        | Morocco          | Slovak Republic     | Uruguay              |
| Botswana          | El Salvador        | Italy         | Netherlands      | Slovenia            | Vietnam              |
| Brazil            | Estonia            | Jamaica       | Nicaragua        | South Africa        | Zambia               |
| Brunei Darussalam | Finland            | Japan         | Norway           | Korea               |                      |
| Bulgaria          | France             | Jordan        | Oman             | Spain               |                      |
| Burkina Faso      | Gabon              | Kazakhstan    | Pakistan         | Sri Lanka           |                      |
| Cameroon          | Gambia             | Kenya         | Panama           | Sudan               |                      |
| Canada            | Germany            | Kuwait        | Papua New Guinea | Sweden              |                      |
| Chile             | Ghana              | Latvia        | Paraguay         | Switzerland         |                      |
| China             | Greece             | Lebanon       | Peru             | Tanzania            |                      |
| Colombia          | Guatemala          | Lithuania     | Philippines      | Thailand            |                      |
| Congo             | Guinea             | Luxembourg    | Poland           | Togo                |                      |
| Costa Rica        | Haiti              | Madagascar    | Portugal         | Trinidad and Tobago |                      |

## **Appendix C.**

### **C1. Marginal plots related to Table 3**

*Relative change in civil disorder index*

**Marginal plot (Model 3, Table 3)**

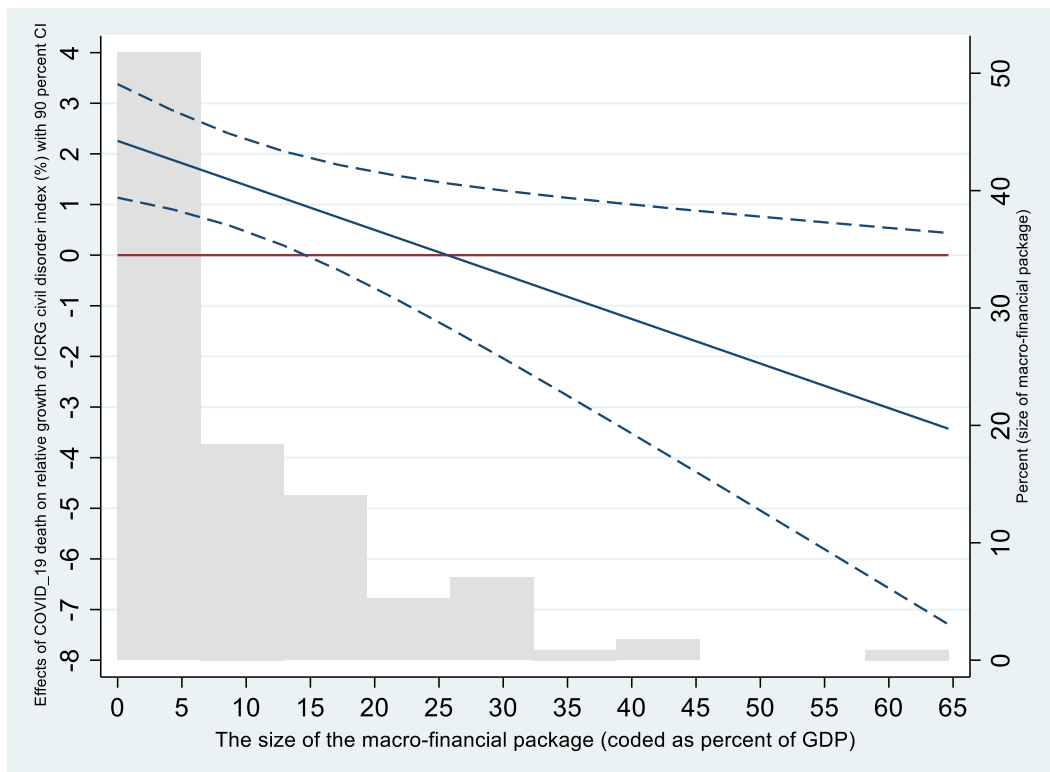

**Marginal plot (Model 4, Table 3)**

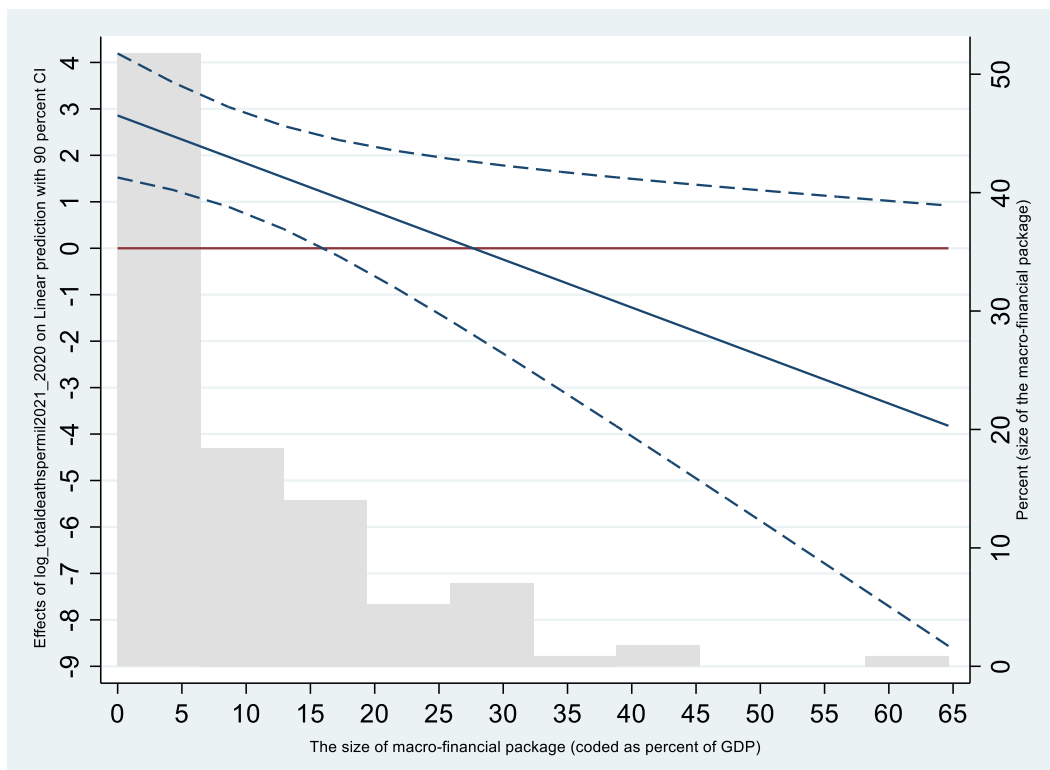

**Marginal plot (Model 5, Table 3)**

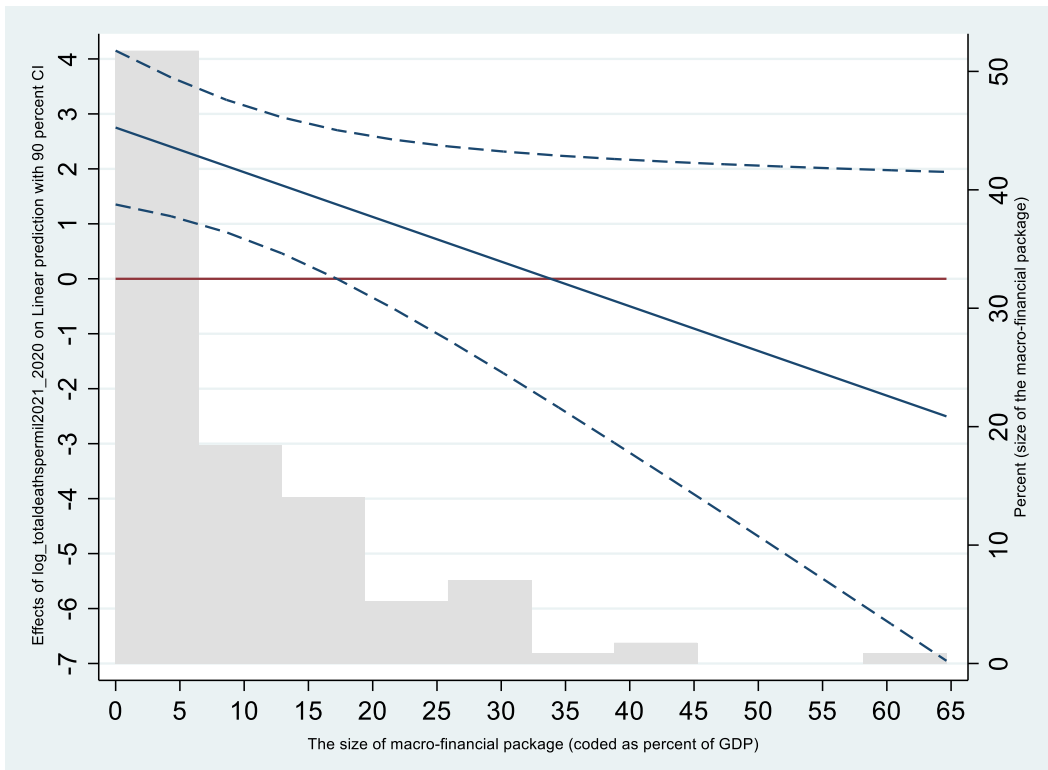

**Marginal plot (Model 6, Table 3)**

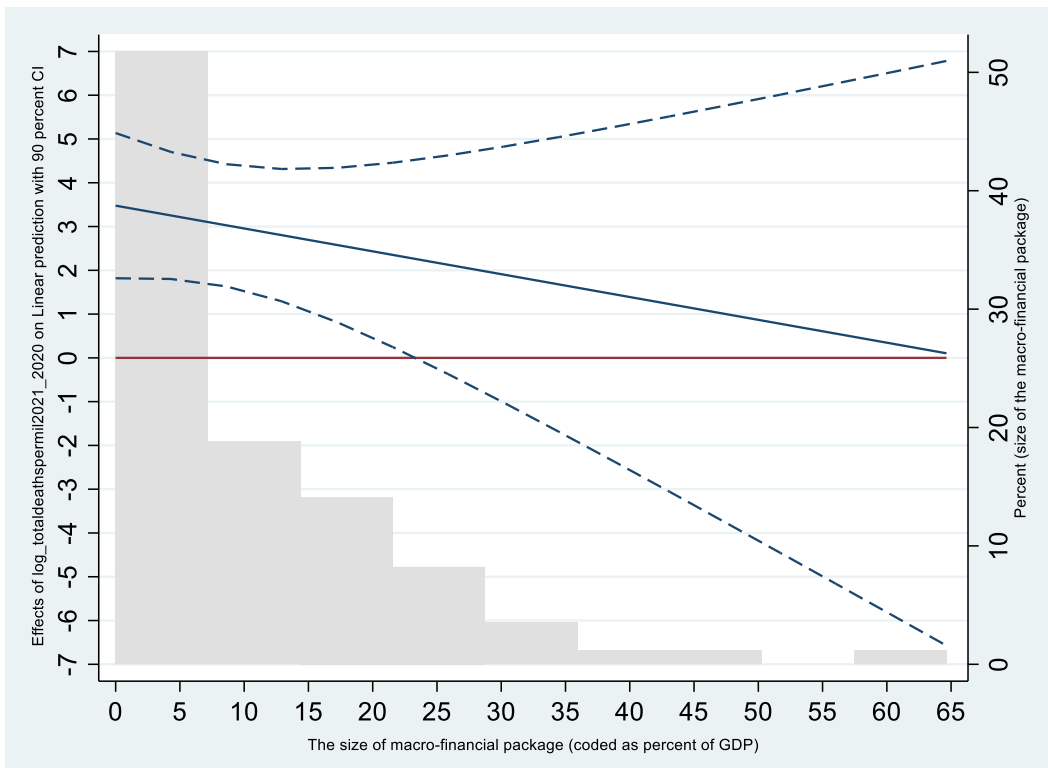

**Marginal plot (Model 7, Table 3)**

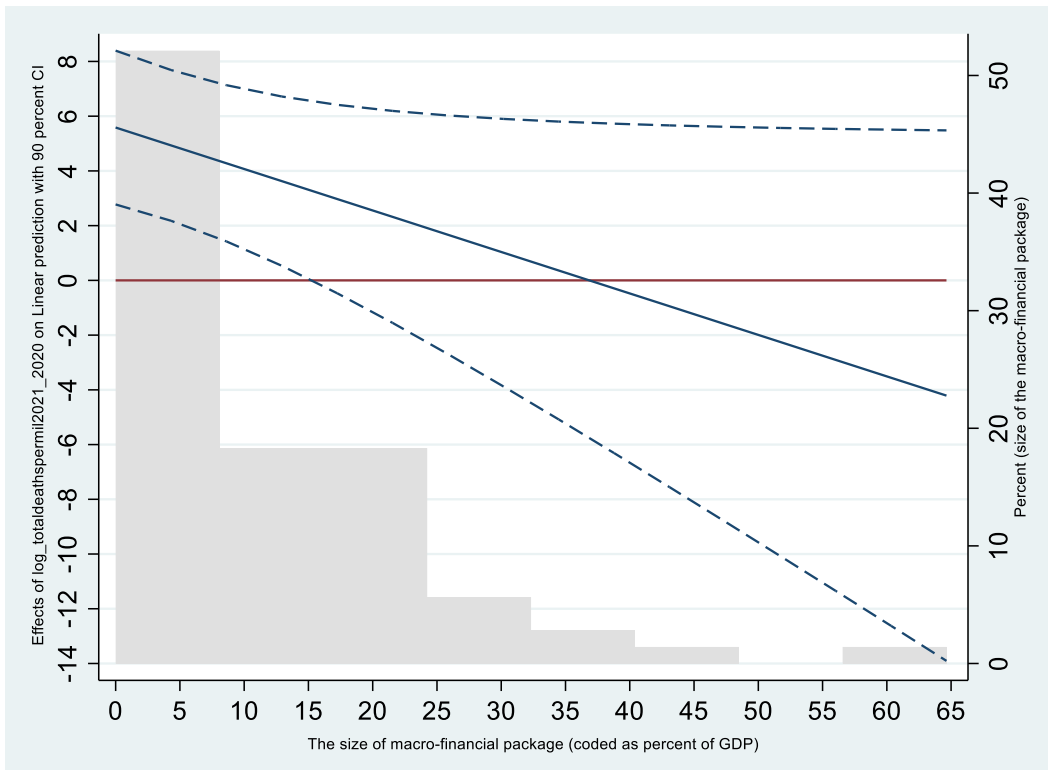

**Marginal plot (Model 8, Table 3)**

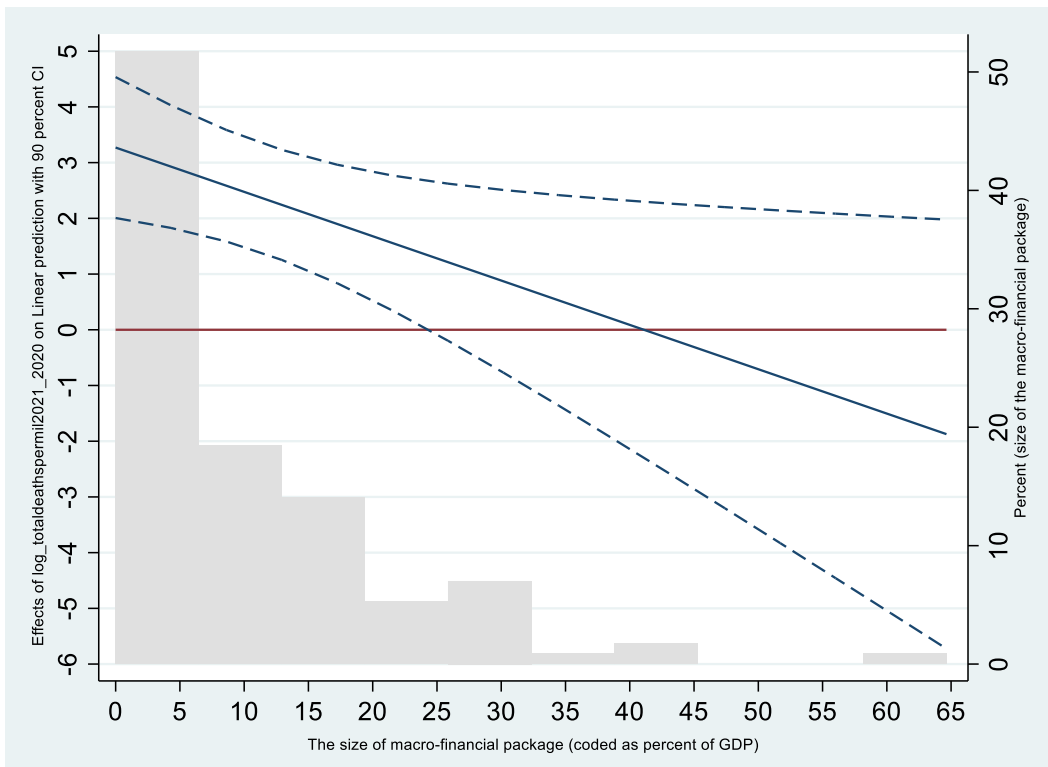



## **C2. Marginal plots related to Table A5 in the Appendix**

*Absolute change in civil disorder index*

**Marginal plot (Model 3, Table A5)**

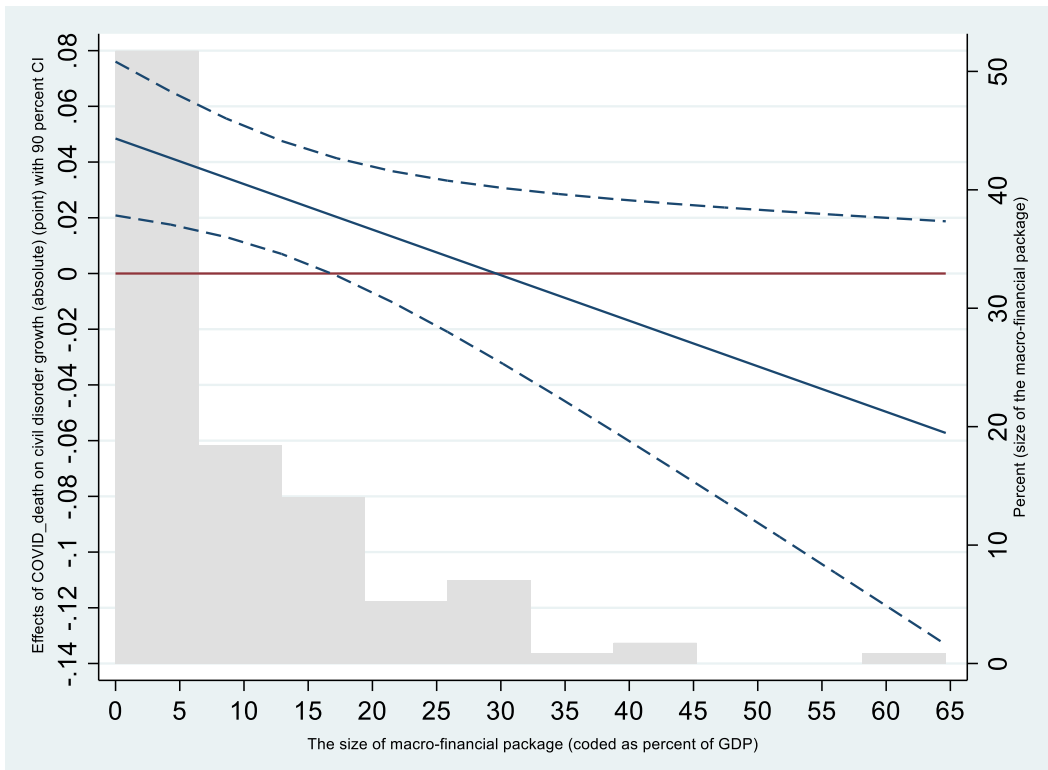

**Marginal plot (Model 4, Table A5)**

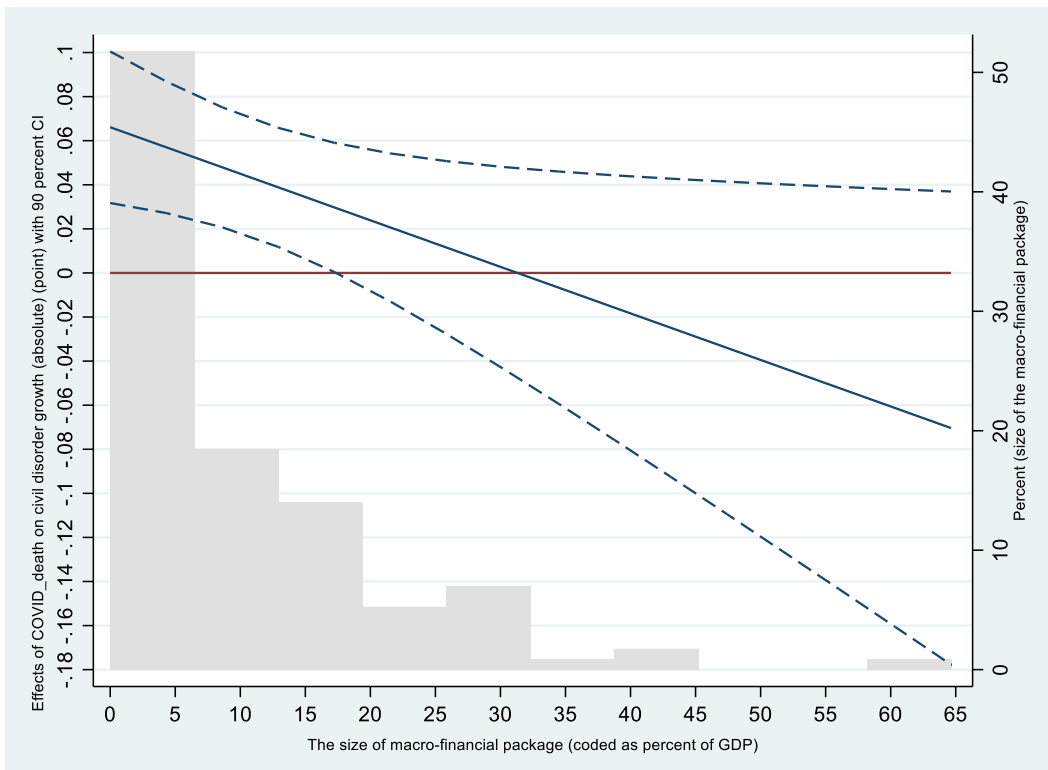

**Marginal plot (Model 5, Table A5)**

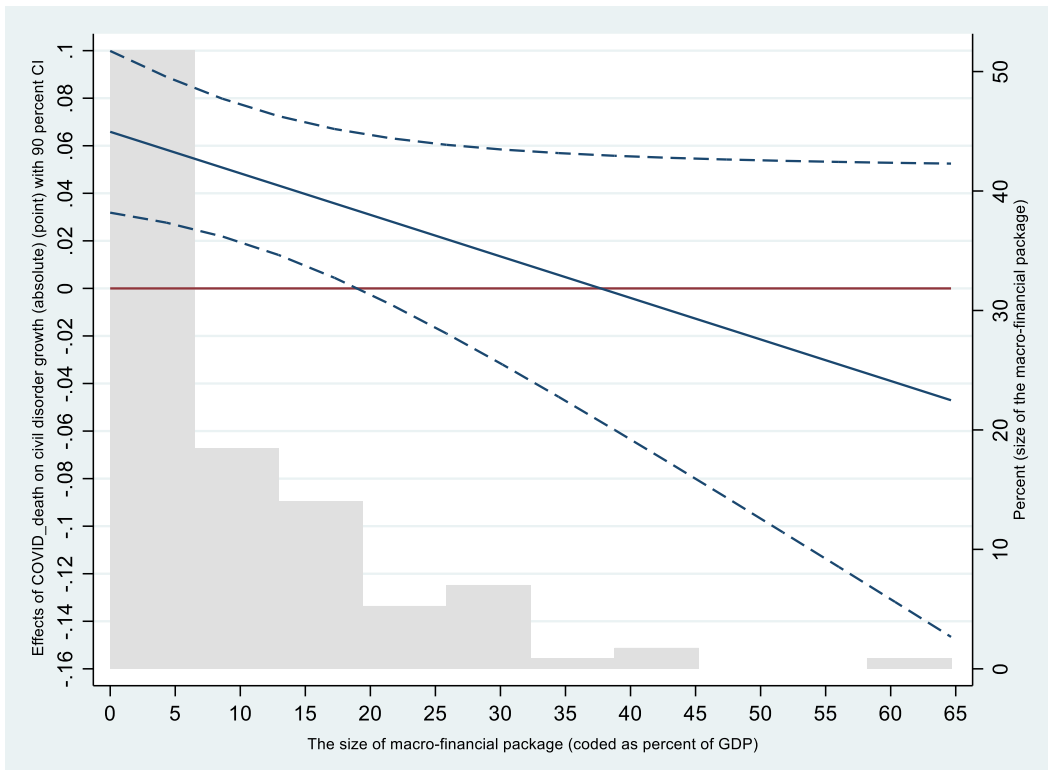

**Marginal plot (Model 6, Table A5)**

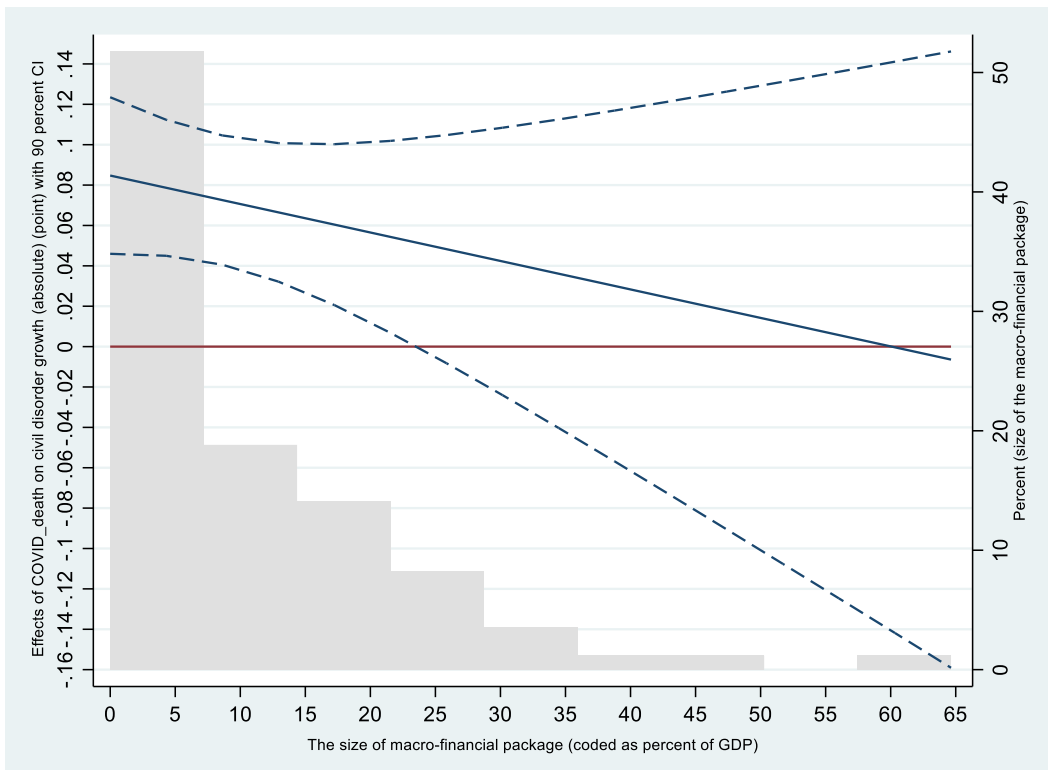

**Marginal plot (Model 7, Table A5)**

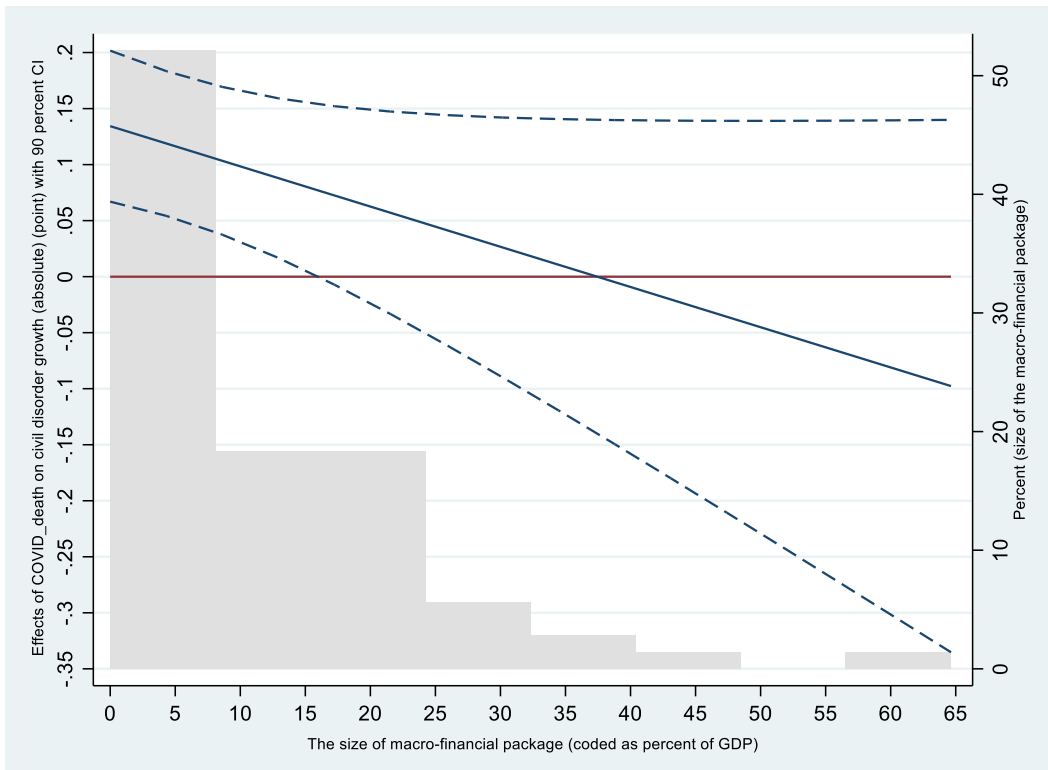

**Marginal plot (Model 8, Table A5)**

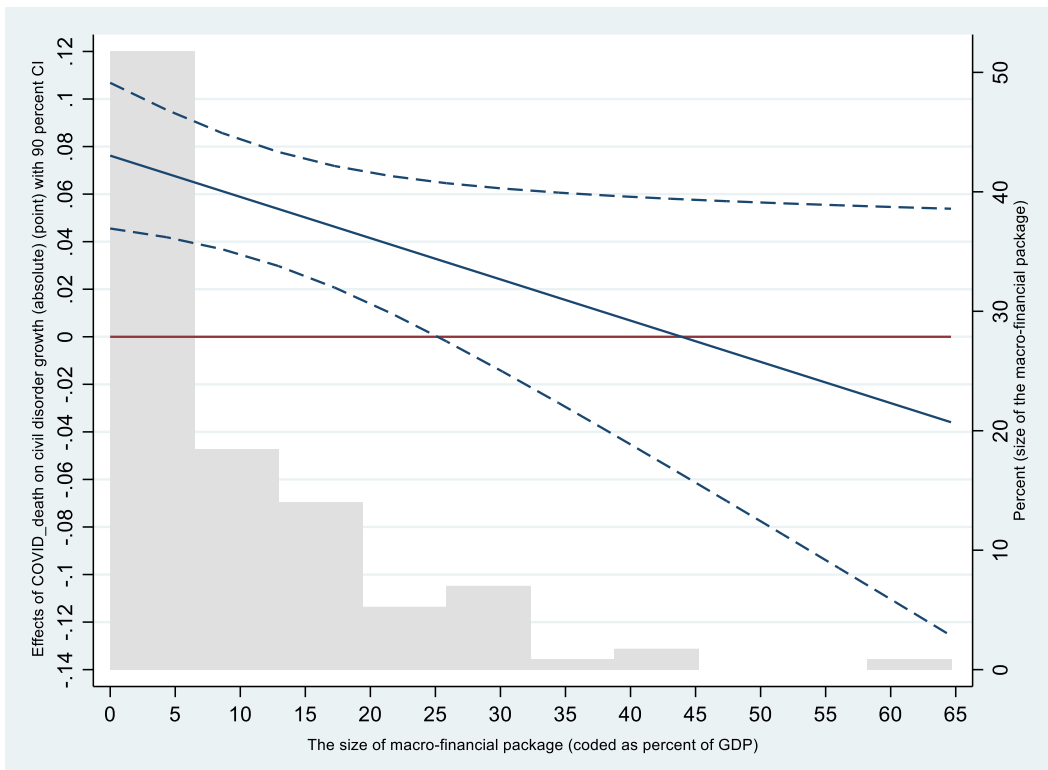

### **C3. Marginal plots related to Table A8**

*Relative change in civil disorder, excluding 17 countries with no change in their civil disorder index during the pandemic*

**Marginal plot (Model 3, Table A8)**

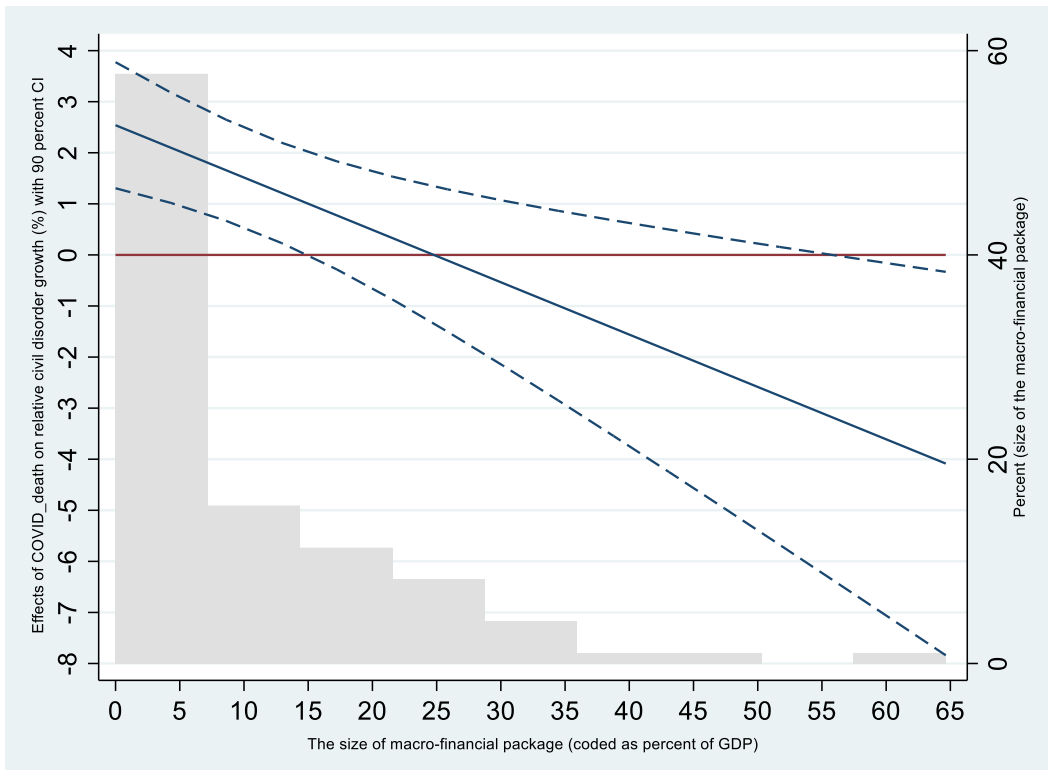

**Marginal plot (Model 4, Table A8)**

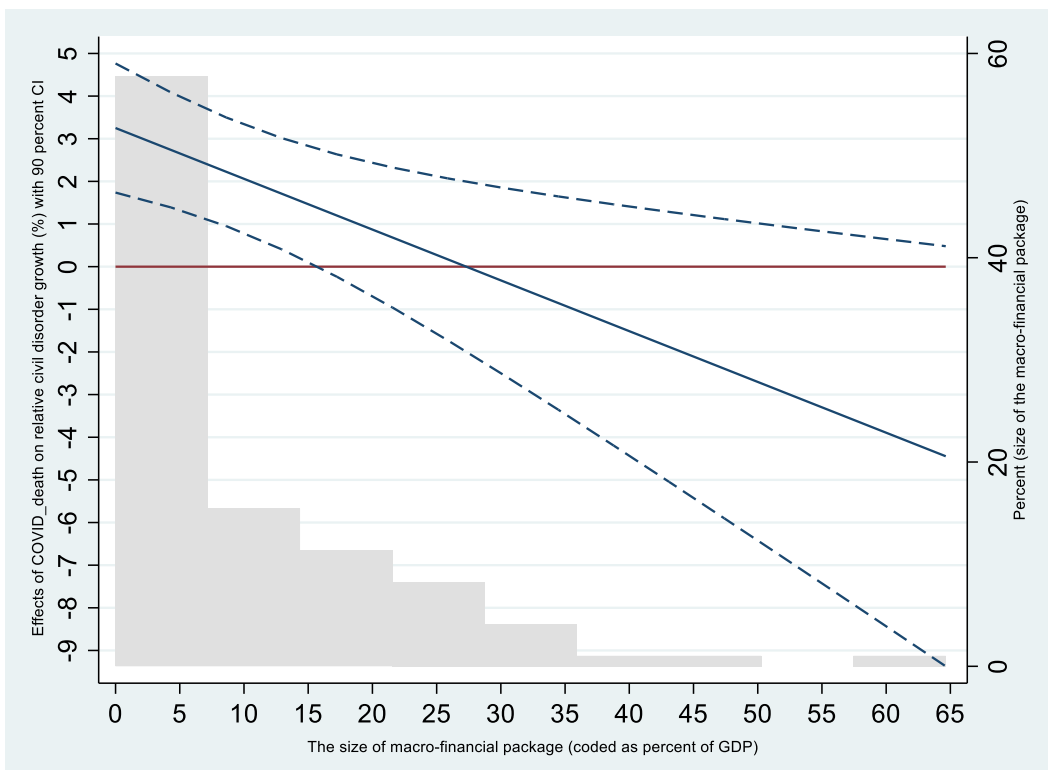

**Marginal plot (Model 5, Table A8)**

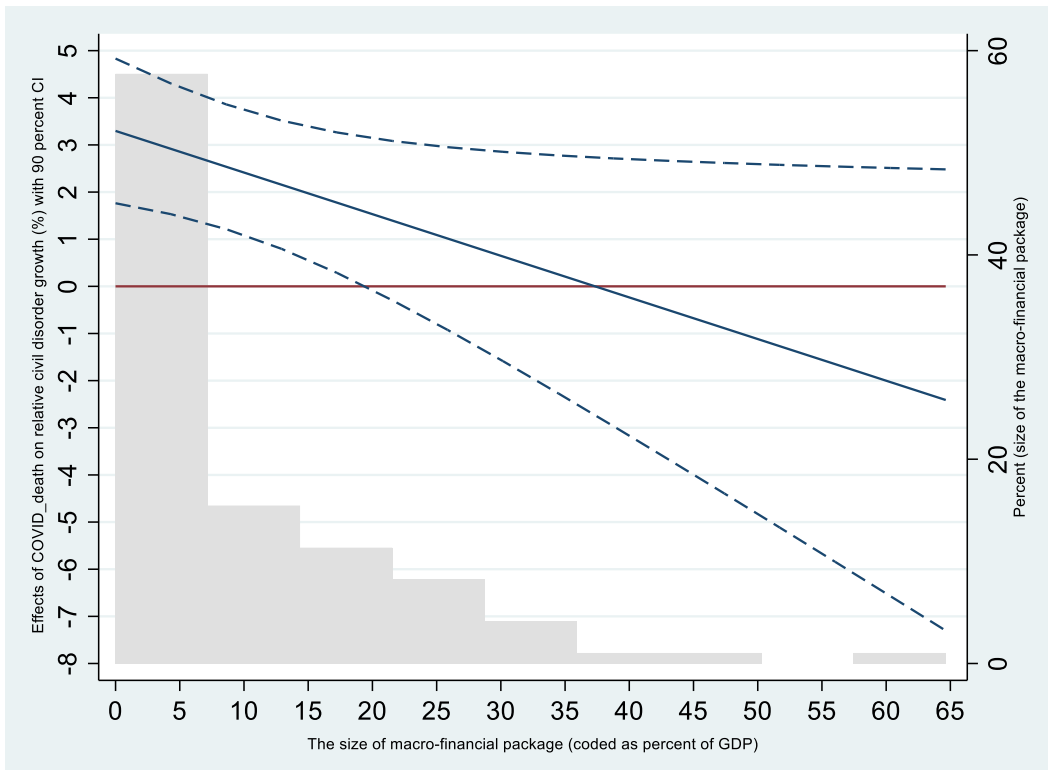

**Marginal plot (Model 6, Table A8)**

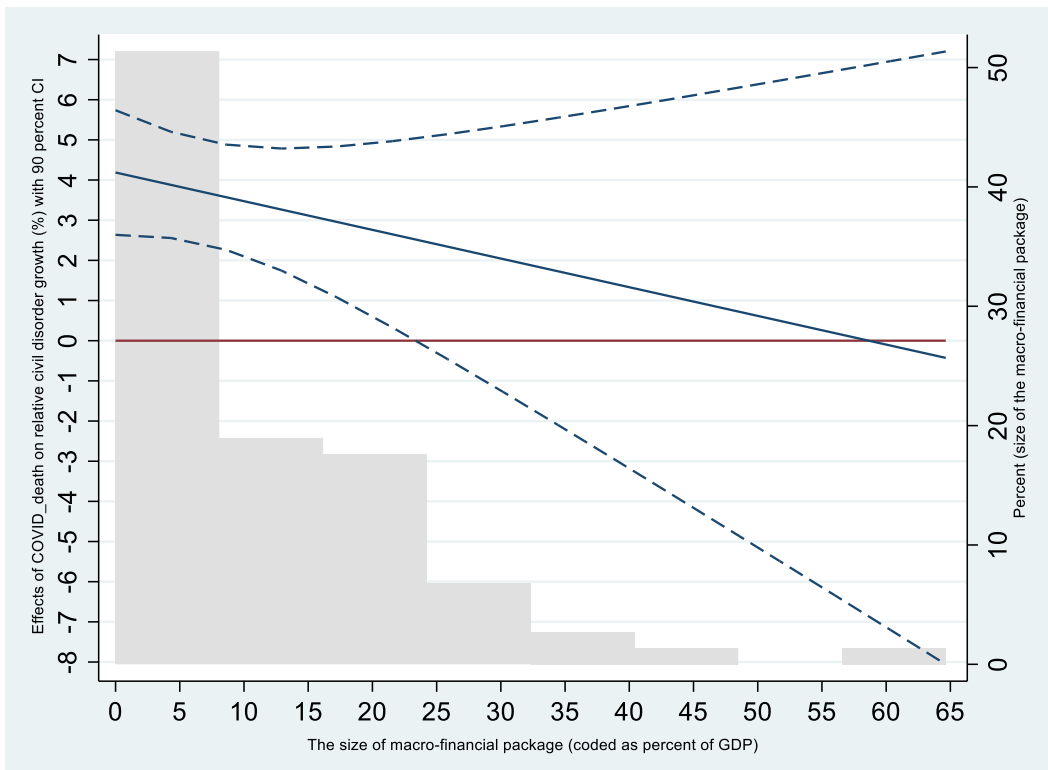

**Marginal plot (Model 7, Table A8)**

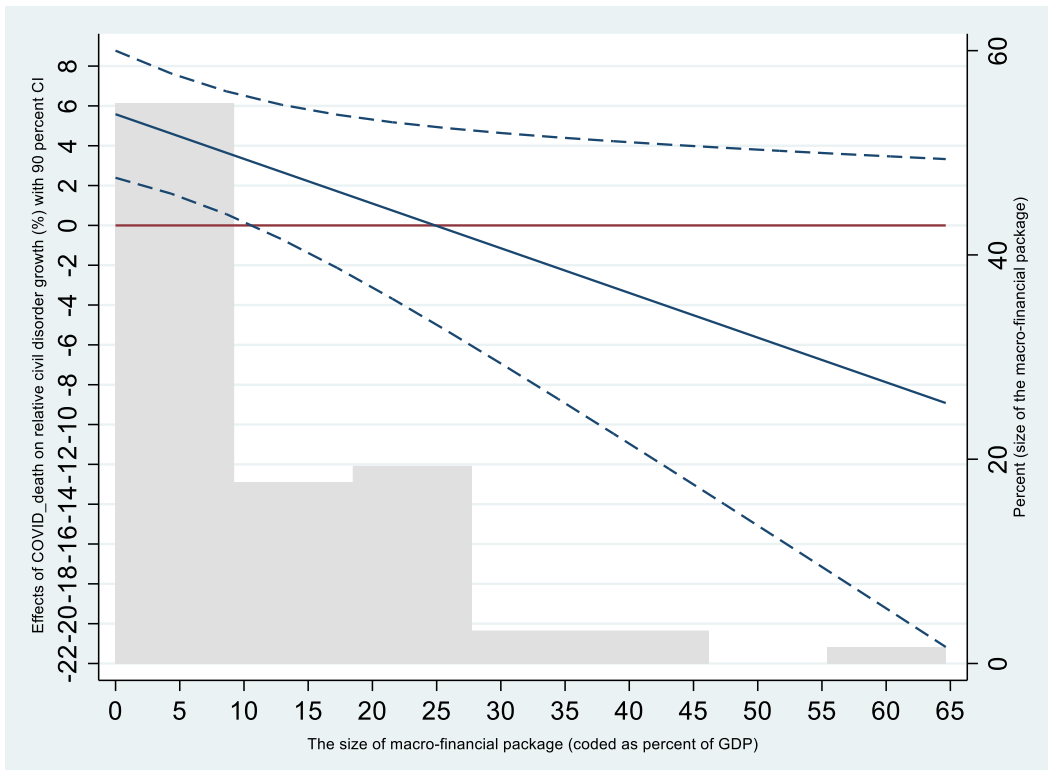

**Marginal plot (Model 8, Table A8)**

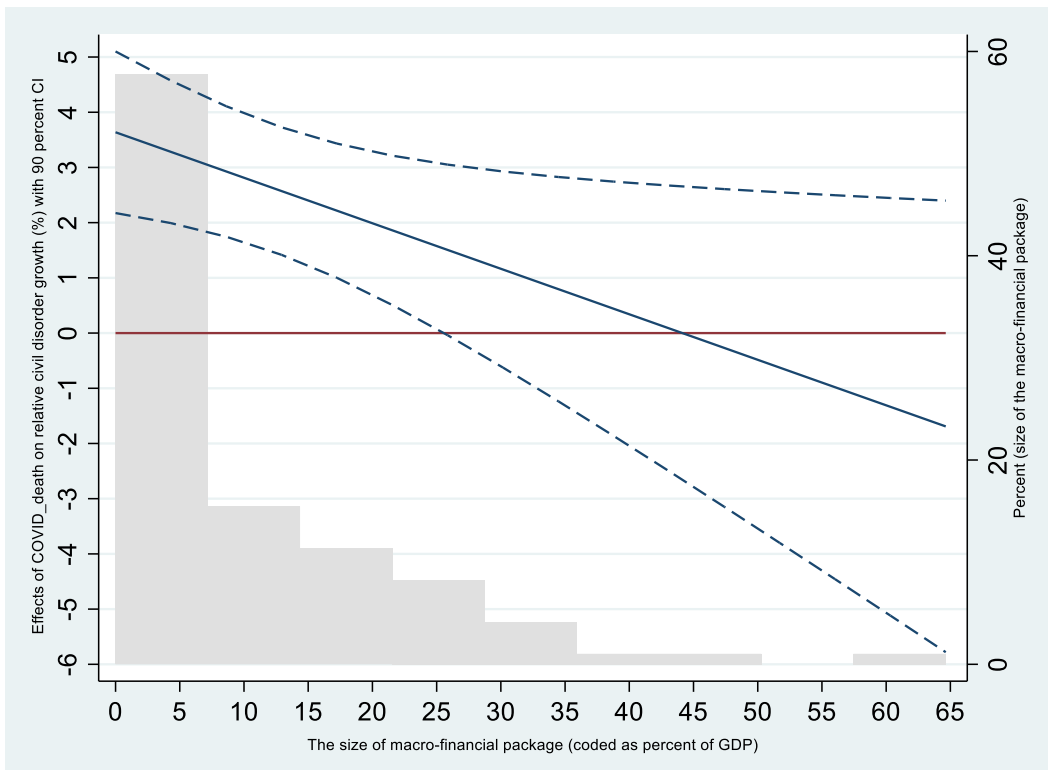



## **C4. Marginal plots related to Table 4**

*Relative and absolute change in civil disorder & excess COVID-19 death*

**Marginal plot (Model 1, Table 4):** Full sample, *Relative growth of ICRG civil disorder index (%)*

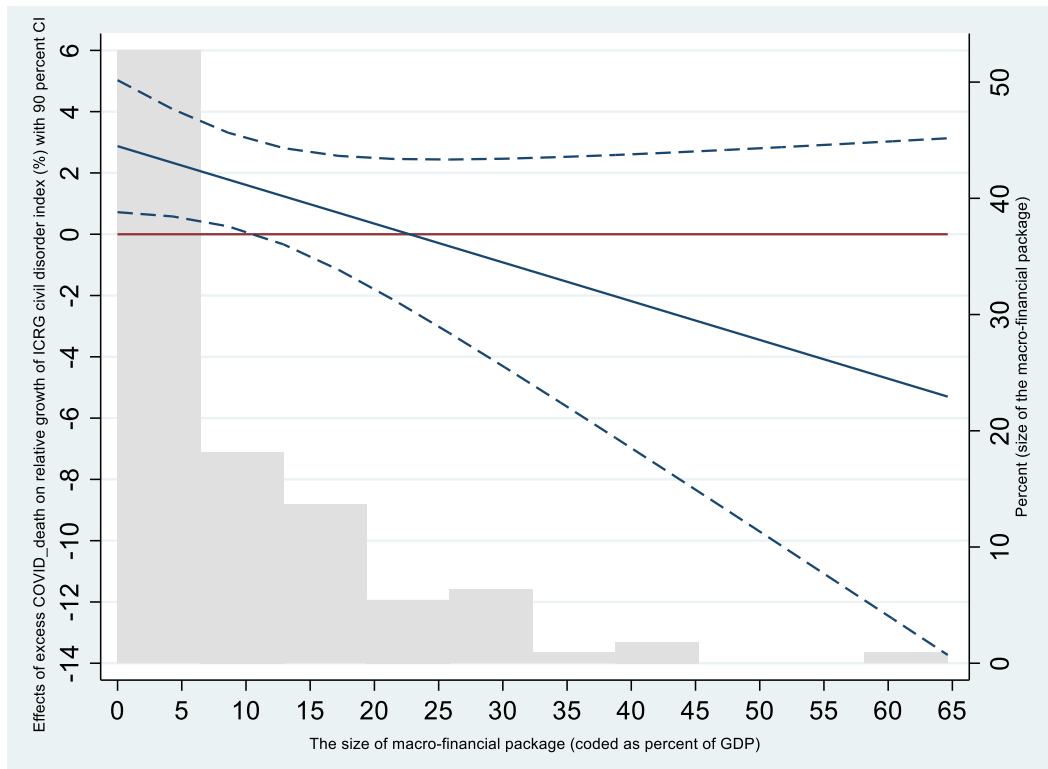

**Marginal plot (Model 2, Table 4):** Excluding countries with no change in civil disorder, *Relative growth of ICRG civil disorder index (%)*

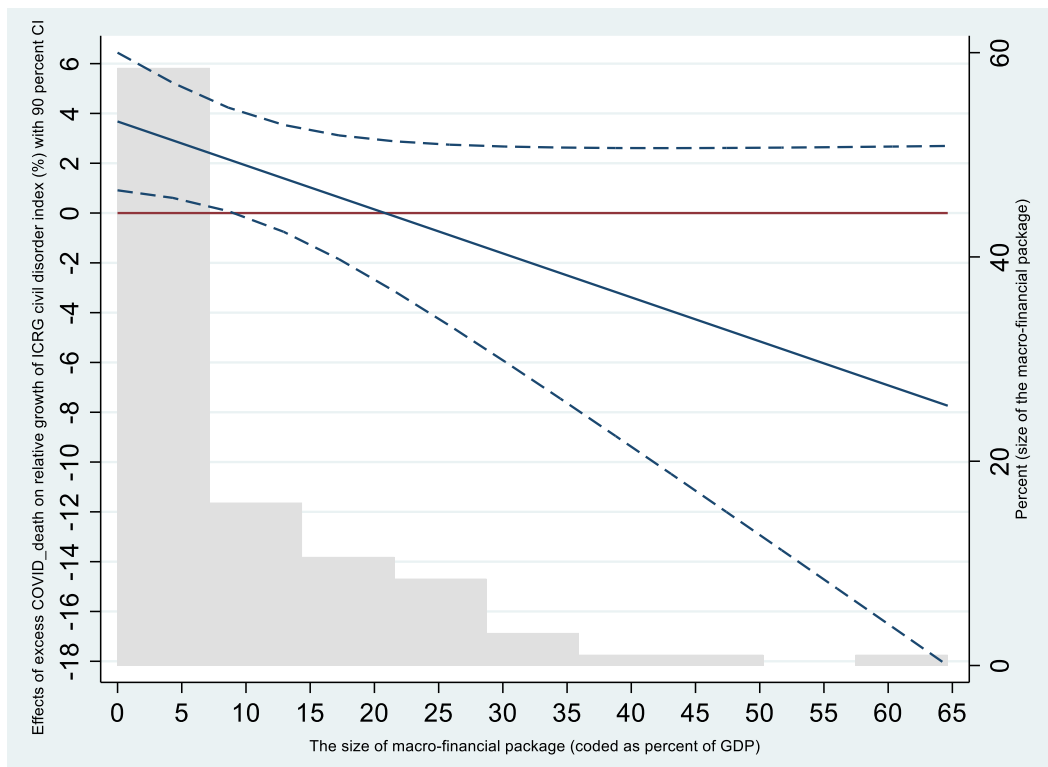

**Marginal plot (Model 3, Table 4):** Full sample, *Absolute change of ICRG civil disorder index (points)*

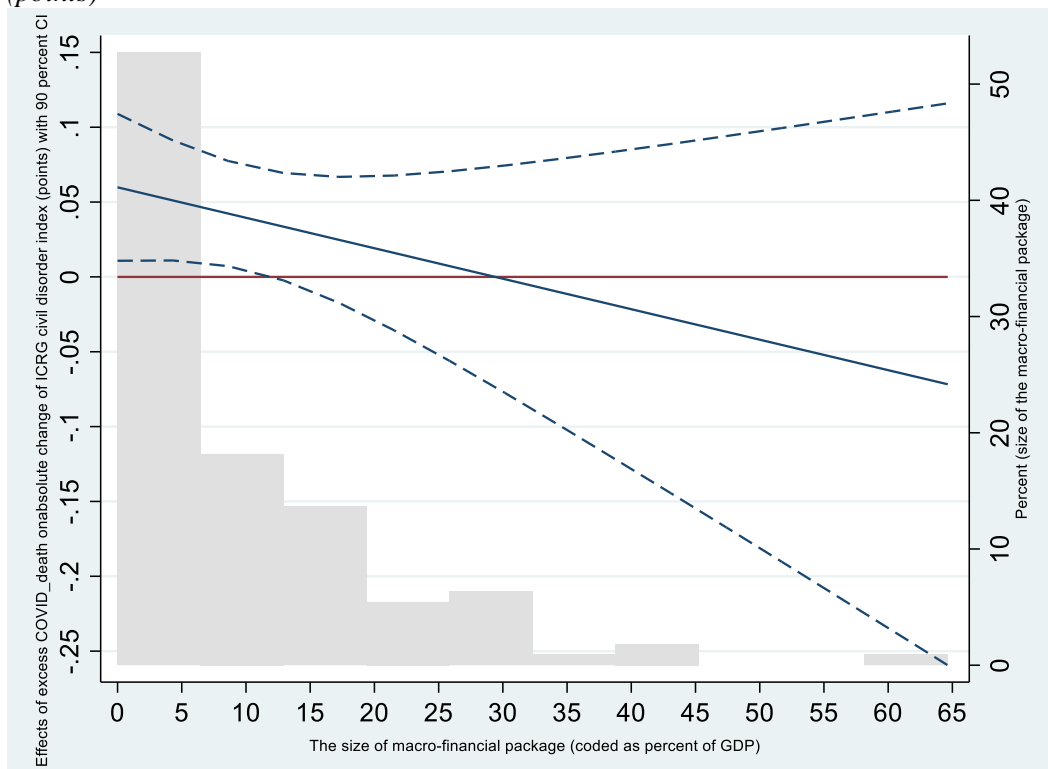

**Marginal plot (Model 4, Table 4):** Excluding countries with no change in civil disorder, *Absolute change of ICRG civil disorder index (points)*

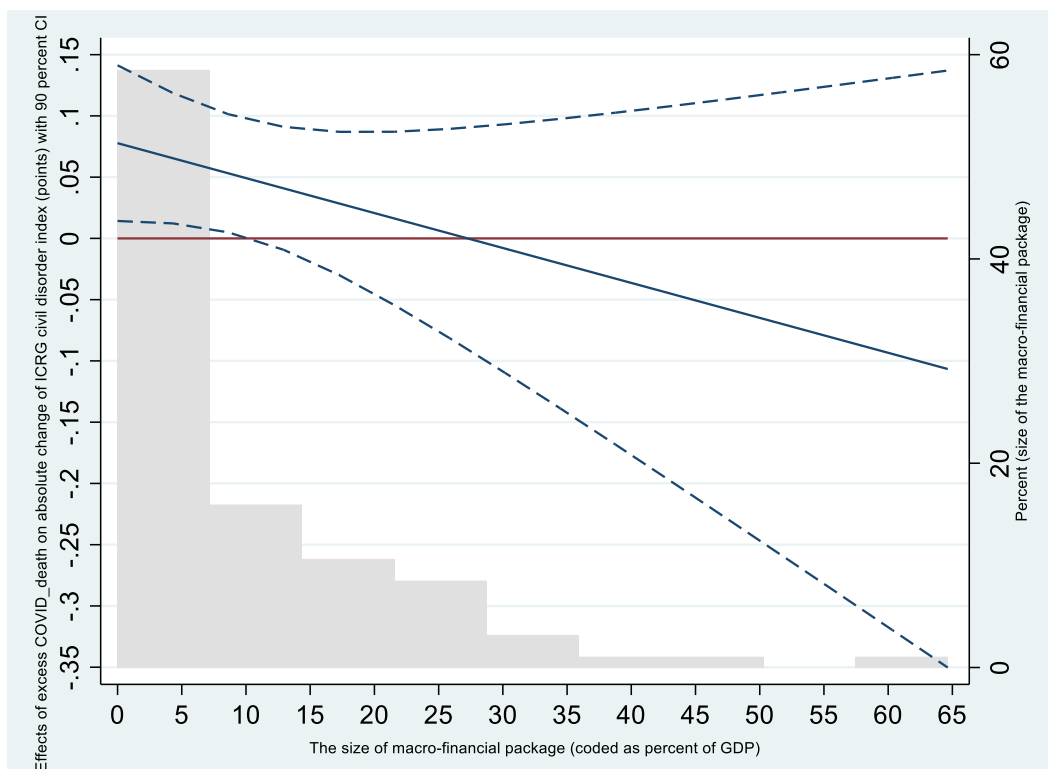

## **C5. Additional analyses in addressing influential outliers**

### **C5a. Marginal plots related to Table 7.**

*Model 8 of Table 3, OLS and Robust regressions with robust standard errors*

**Marginal plot based on MM regression results (95% efficiency).**

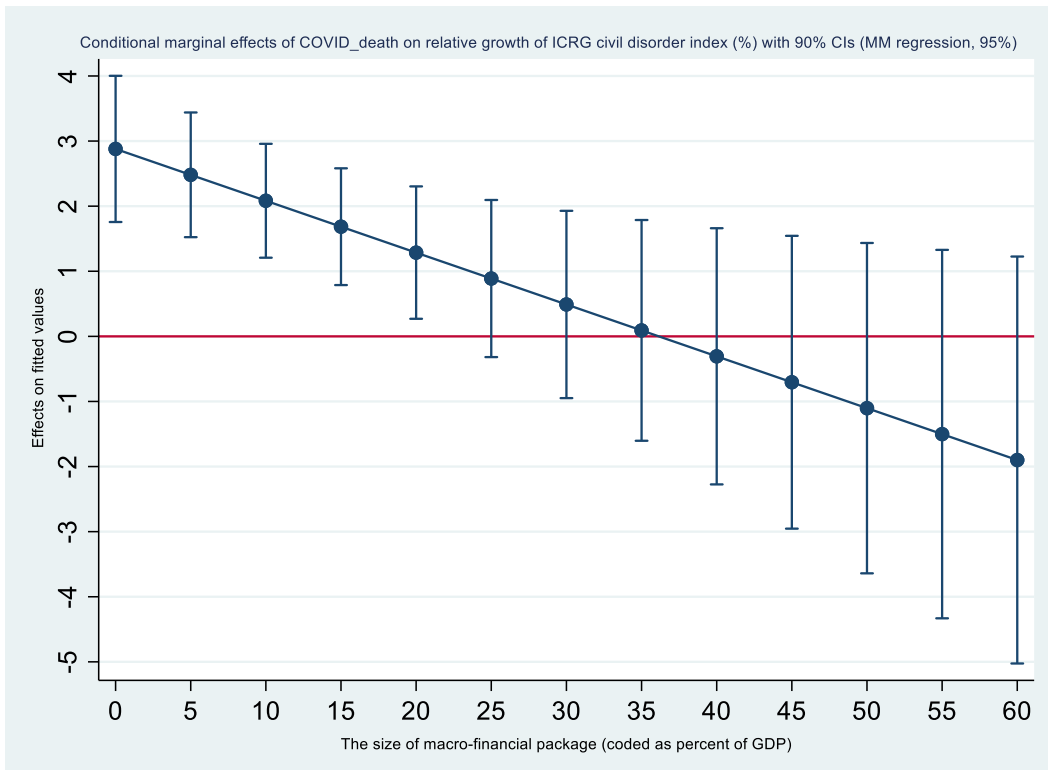

**Marginal plot related to the S regression results (with 28.7% efficiency of OLS)**

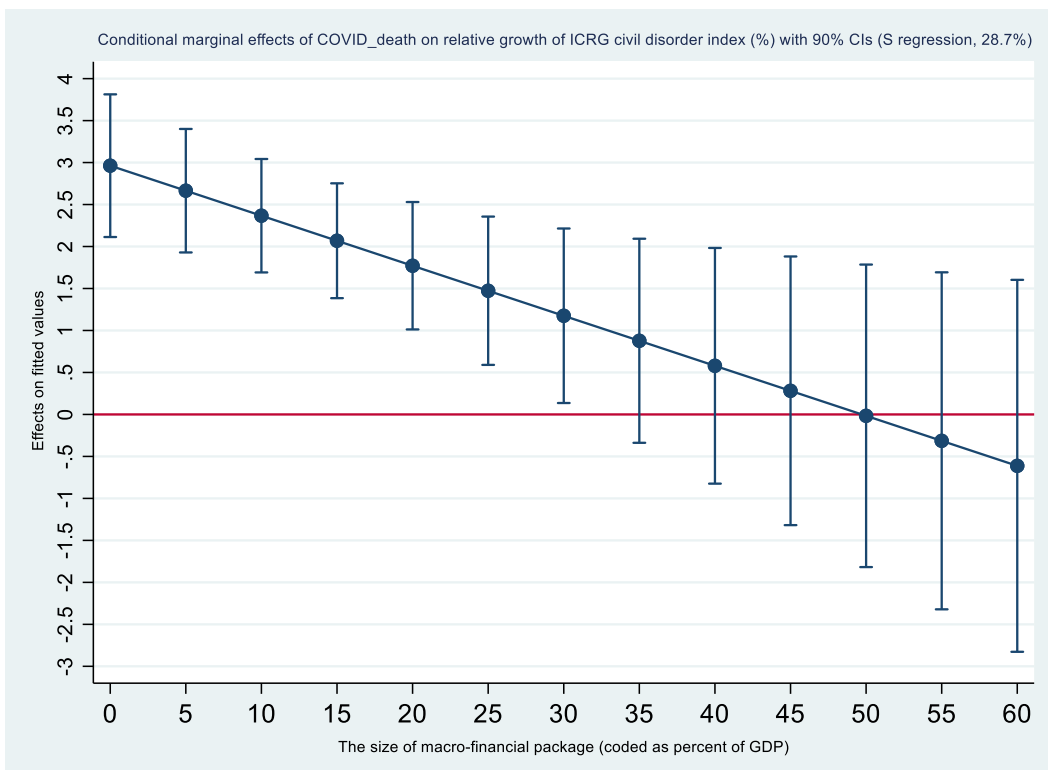

### Marginal plot related to M regression (95% efficiency) results

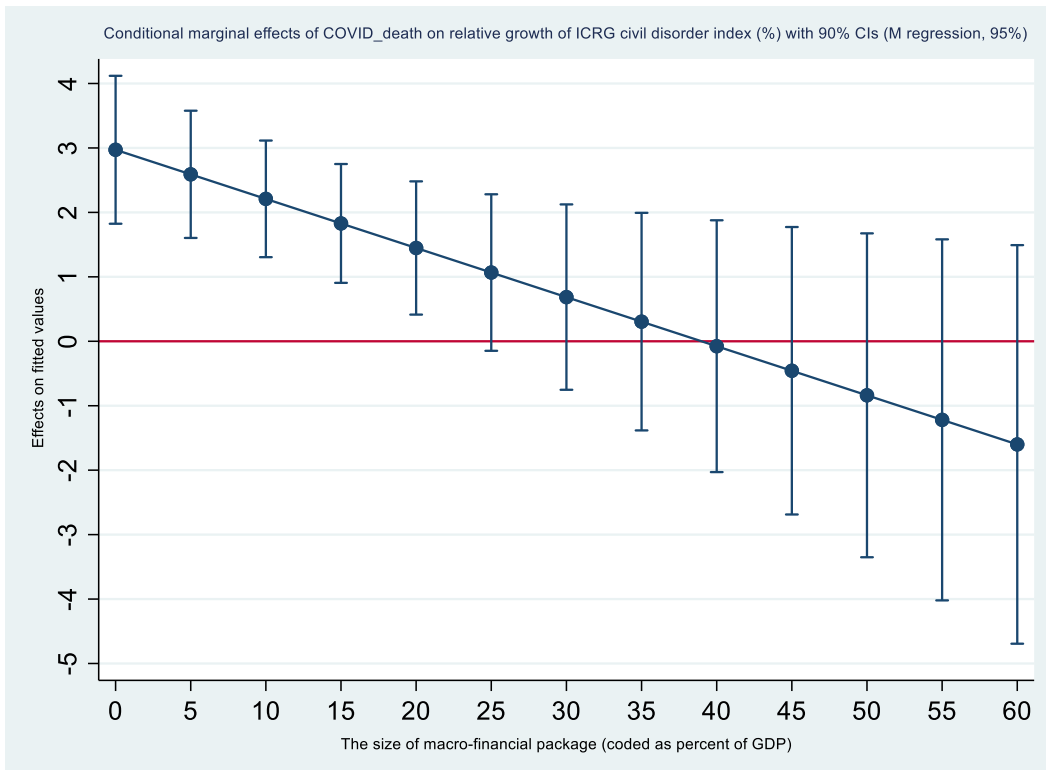

**C5b. Marginal plots related to Table 8.**

*Model 8 of Table 3, OLS and Robust regressions with  
Jackknife Standard Errors*

### Marginal plot, Model 1 in Table 8

Conditional marginal effects of *COVID\_death* on relative growth of ICRG civil disorder index (%) with 90% CIs (OLS, Jackknife estimation)

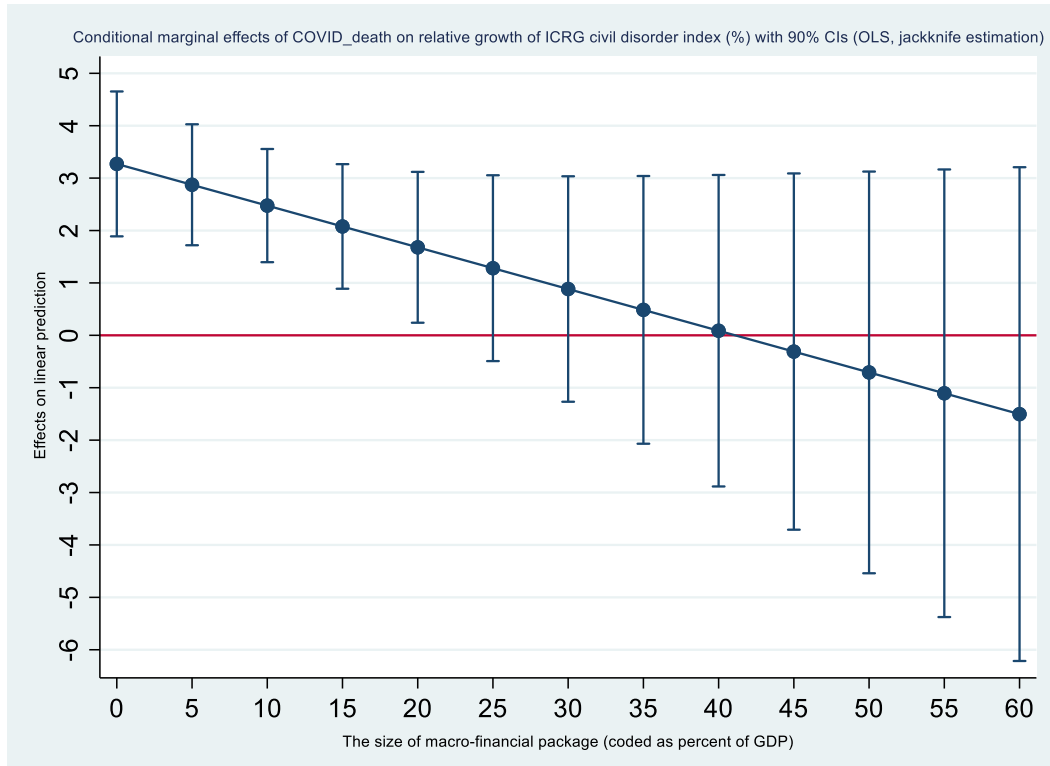

### Marginal plots, Model 2 in Table 8

Conditional marginal effects of *COVID\_death* on relative growth of ICRG civil disorder index (%) with 90% CIs (M regression 95, Jackknife estimation)

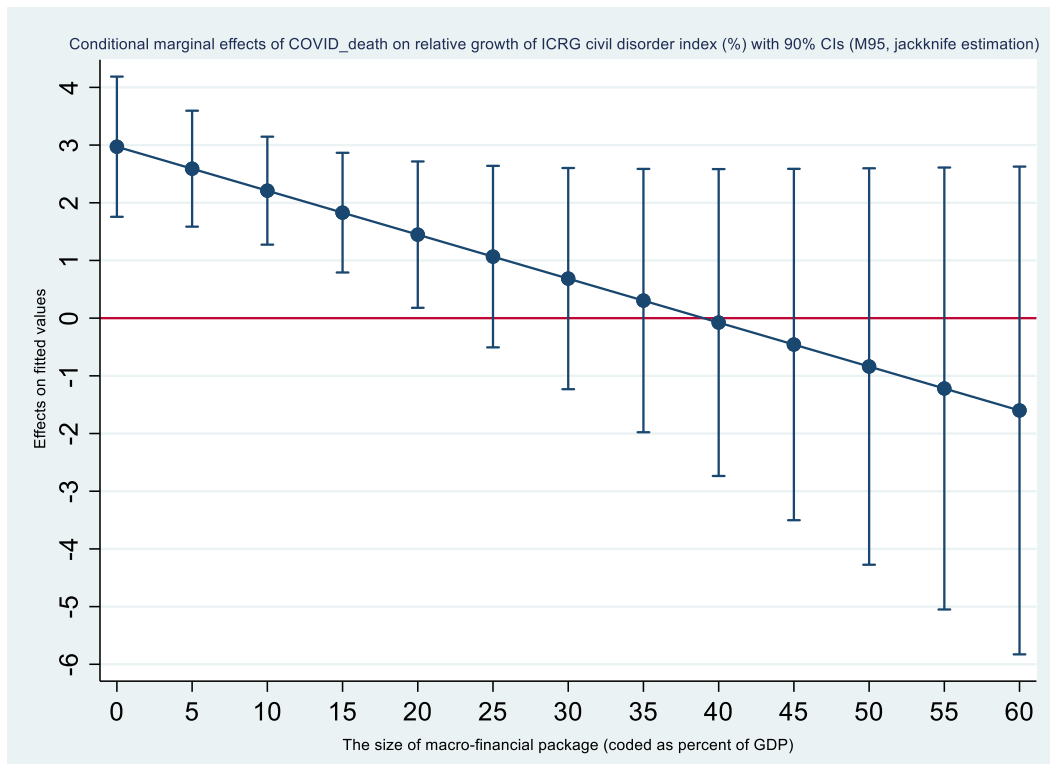



### Marginal plot, Model 3 in Table 8

Conditional marginal effects of *COVID\_death* on relative growth of ICRG civil disorder index (%) with 90% CIs (S regression 28.7, Jackknife estimation)

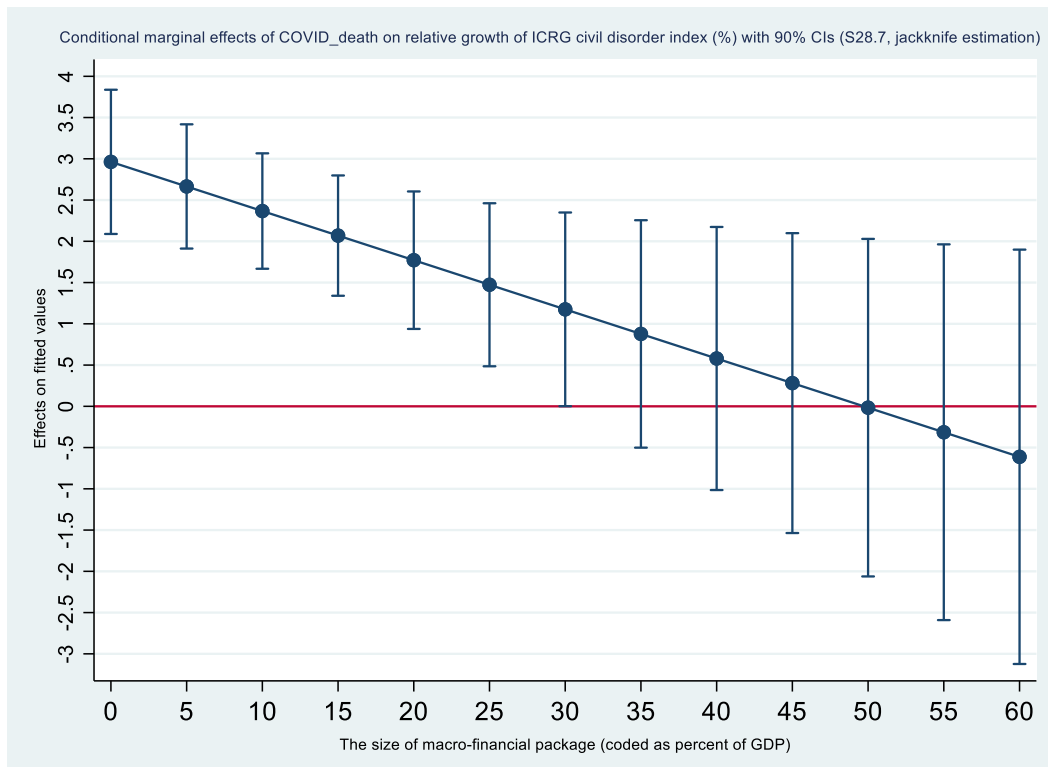

### Marginal plot, Model 4 in Table 8

Conditional marginal effects of *COVID\_death* on relative growth of ICRG civil disorder index (%) with 90% CIs (MM regression (85% efficiency), Jackknife estimation)

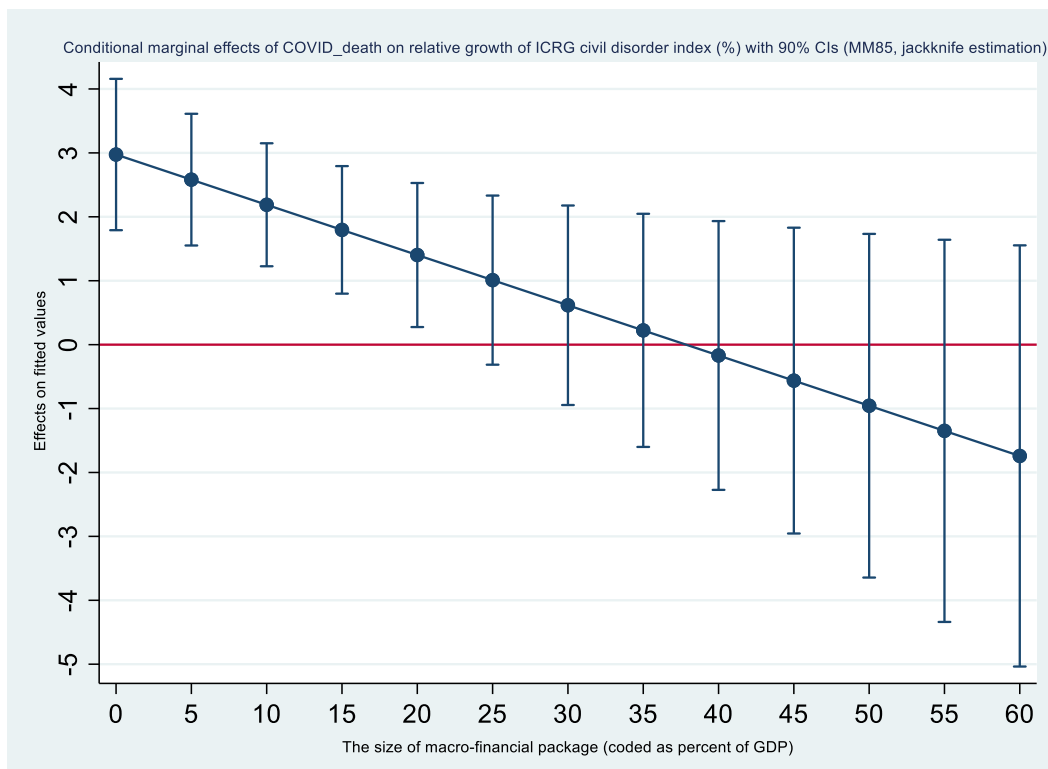

### Marginal plot, Model 5 in Table 8

Conditional marginal effects of *COVID\_death* on relative growth of ICRG civil disorder index (%) with 90% CIs (MM regression (95% efficiency), Jackknife estimation)

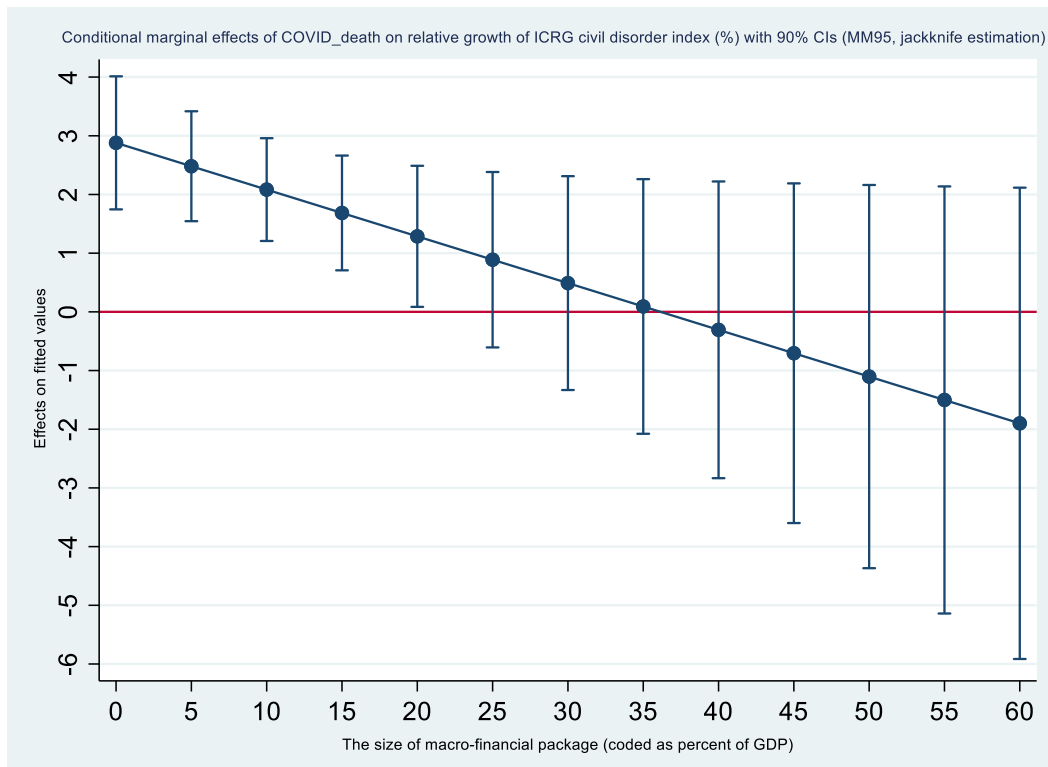

### Marginal plot, Model 6 in Table 8

Conditional marginal effects of *COVID\_death* on relative growth of ICRG civil disorder index (%) with 90% CIs (MM regression (99% efficiency), Jackknife estimation)

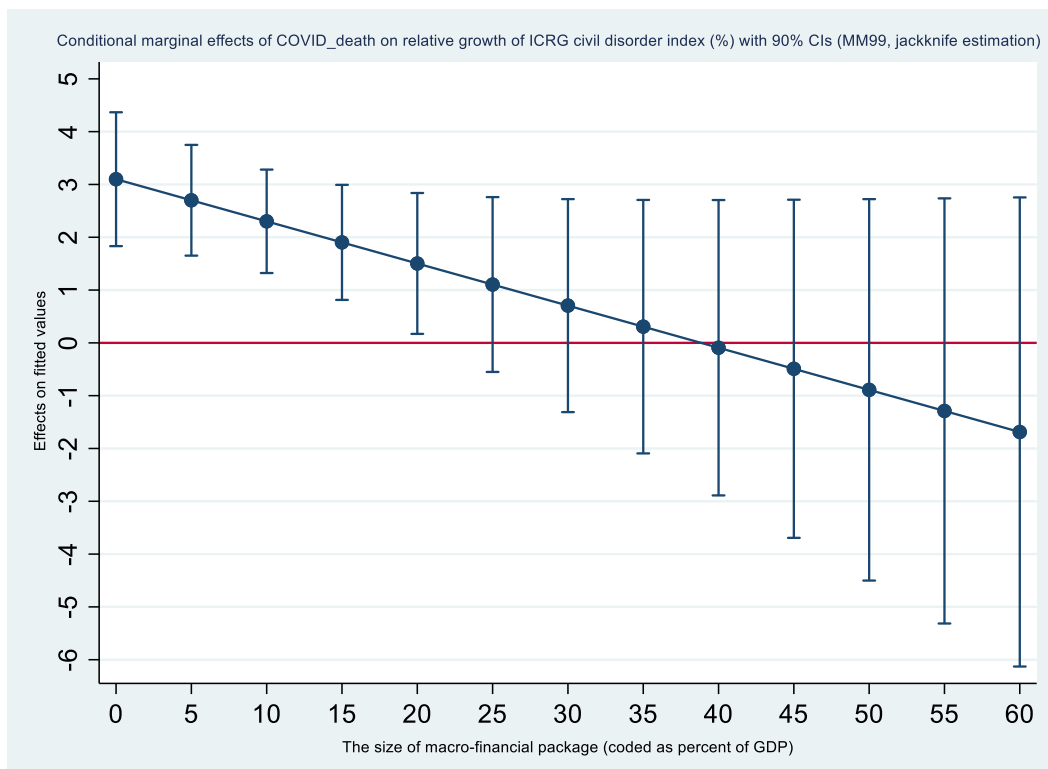

**C5c. Marginal plots related to Table 9.**

*Model 1 of Table 4, OLS and Robust regressions with robust standard errors*

### Marginal plots, Model 5 in Table 9

Conditional marginal effects of Excess *COVID\_death* on relative growth of ICRG civil disorder index (%) with 90% CIs

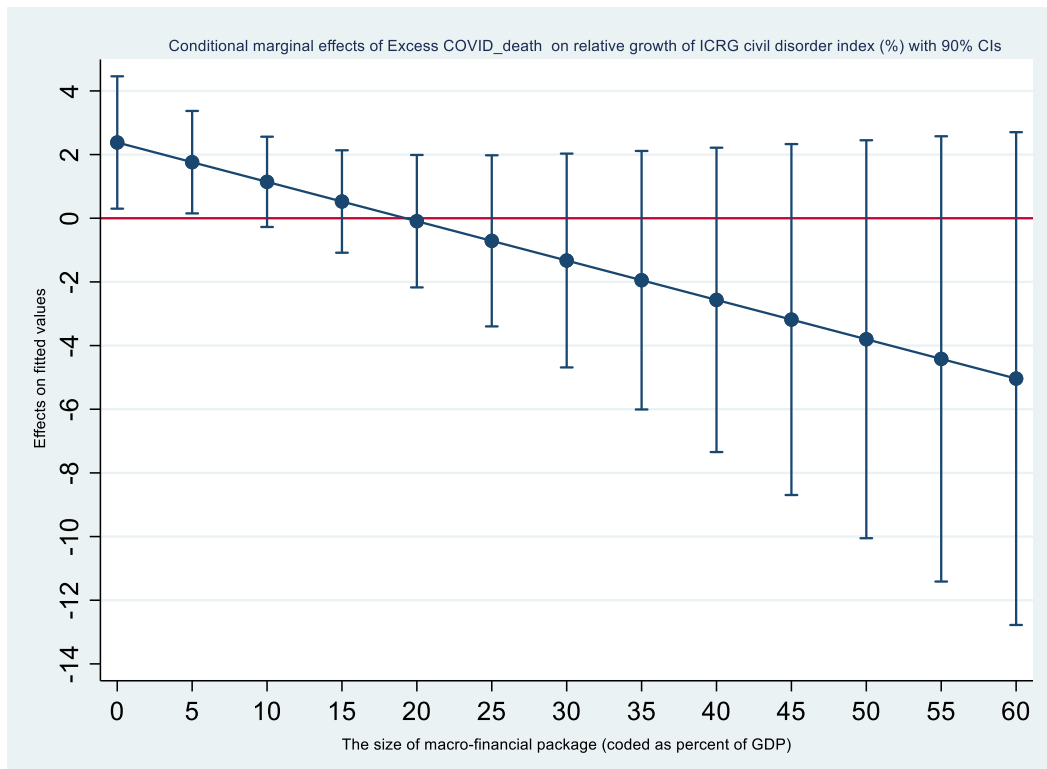

### Marginal plots, Model 6 in Table 9

Conditional marginal effects of Excess *COVID\_death* on relative growth of ICRG civil disorder index (%) with 90% CIs

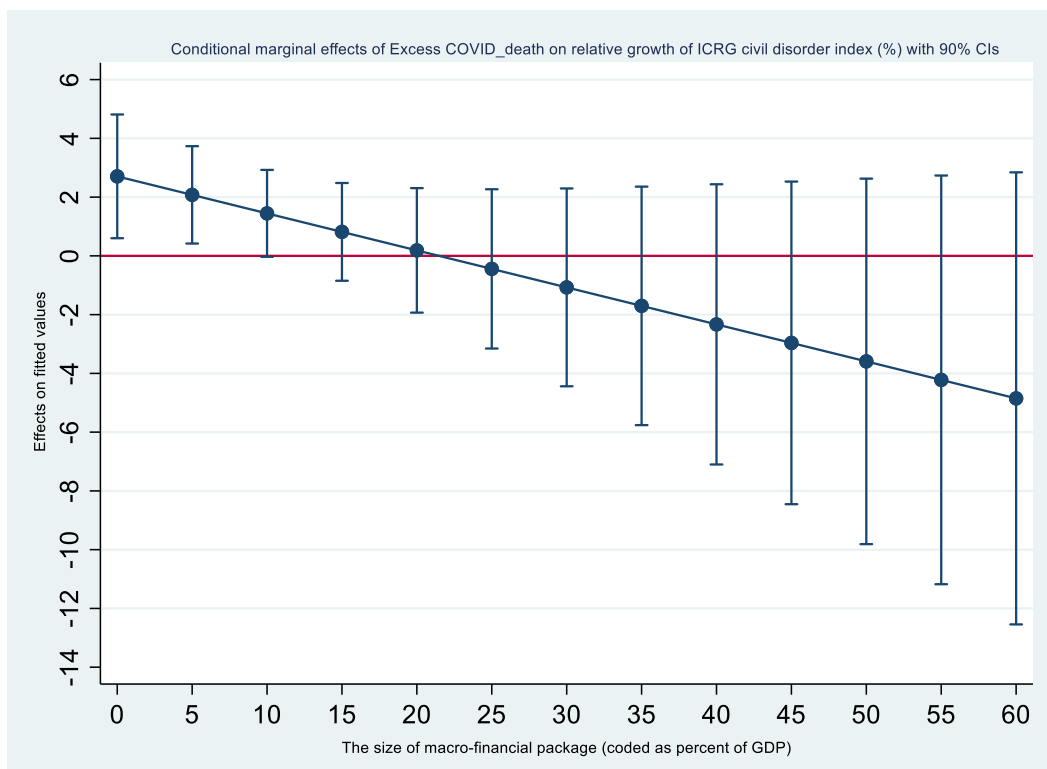

**C5d. Marginal plots related to Table 10.**

*Model 1 of Table 4, OLS and Robust regressions with  
Jackknife Standard Errors*

### Marginal plots, Model 5 in Table 10 with Jackknife Standard Errors

Conditional marginal effects of Excess *COVID\_death* on relative growth of ICRG civil disorder index (%) with 90% CIs

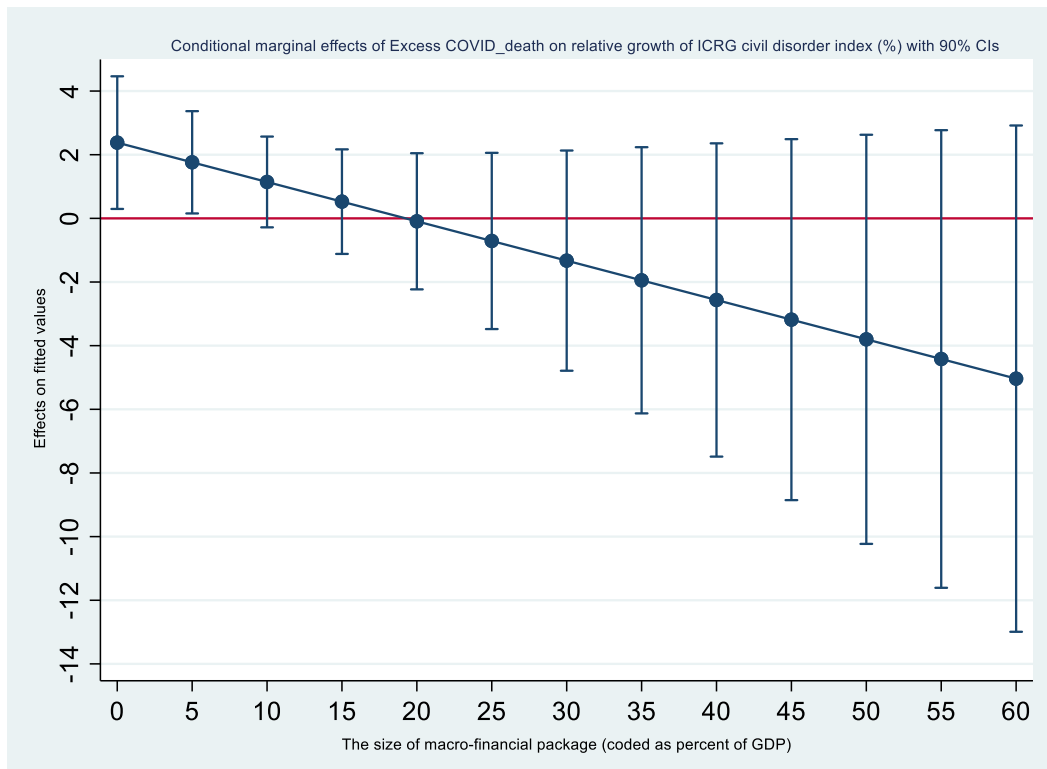

### Marginal plots, Model 6 in Table 10 with Jackknife Standard Errors

Conditional marginal effects of Excess *COVID\_death* on relative growth of ICRG civil disorder index (%) with 90% CIs

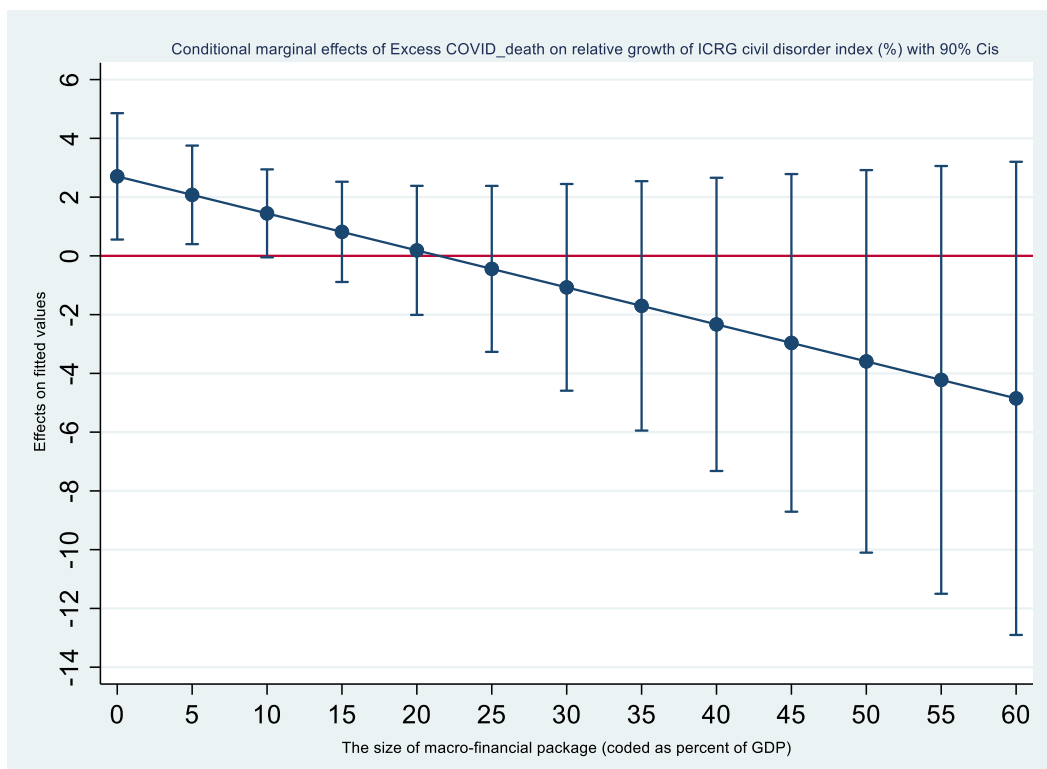

Supplement: mmc1.pdf [file mmc1.pdf]
